# Health System Determinants of Hypertension Care and Outcomes in Sub-Saharan Africa: A Systematic Review

Samuel Byiringiro<sup>1\*</sup>, Oluwabunmi Ogungbe<sup>1</sup>, Yvonne Commodore-Mensah<sup>1,2</sup>, Khadijat Adeleye<sup>3</sup>, Fred Stephen Sarfo<sup>4,5</sup>, Cheryl R. Himmelfarb<sup>1,2</sup>

<sup>1</sup>Johns Hopkins University School of Nursing, Baltimore, Maryland, United States

<sup>2</sup>Johns Hopkins University, Bloomberg School of Public Health, Baltimore, Maryland, United States

<sup>3</sup>University of Massachusetts, Amherst, MA, USA

<sup>4</sup>Kwame Nkrumah University of Science & Technology, Department of Medicine, Kumasi, Ashanti Region, Ghana

<sup>5</sup>Komfo Anokye Teaching Hospital, Kumasi, Ashanti Region, Ghana

**\*Corresponding Author:**

**Email:** [sbyirin1@jhu.edu](mailto:sbyirin1@jhu.edu) (SB)

# Abstract

**Background:** Hypertension is a significant global health problem, particularly in Sub-Saharan Africa (SSA). Despite the effectiveness of medications and lifestyle interventions in reducing blood pressure, shortfalls across health systems continue to impede progress in achieving optimal hypertension control rates. The current review explores health system factors contributing to hypertension outcomes in SSA.

**Methods:** The World Health Organization health systems framework guided the literature search and discussion of findings. We searched PubMed, CINAHL, and Embase databases for studies published between January 2010 and June 2022 and followed the Preferred Reporting Items for Systematic Reviews and Meta-Analyses guidelines. We assessed studies for risk of bias using the tools from Joanna Briggs Institute.

**Results:** Thirty-nine studies clustered in 10 SSA countries met inclusion criteria. Health system determinants included human resource factors such as providers' knowledge and adherence to hypertension treatment guidelines (n=21) and task sharing and shifting strategies (n=10). The second health system factors explored in service delivery were the health facility type and capacity (n=7) and hypertension service accessibility by cost, place, and time of services (n=15). A quarter of the included studies explored supply chain management for access to essential equipment and medicines. An additional set of studies addressed quality improvement strategies involving cross-integration of services (n=7) and various strategies of gauging the systems for better hypertension outcomes (n=8).

**Conclusion:** A combination of multiple rather than solo system interventions may yield significant improvements in blood pressure outcomes. Health information management and leadership involvement were less explored. Additional research on health system determinants of

hypertension is needed to drive global improvements in hypertension outcomes. Future research would benefit from more rigorous implementation type interventional studies comprehensively assessing health system factors that contribute to better hypertension outcomes.

**Keywords:** hypertension, high blood pressure, raised blood pressure, Sub-Saharan Africa, Low- and Middle-Income Countries, health system, health facilities, quality improvement, quality of care

# Introduction

Hypertension remains a global health challenge, especially for low- and middle-income countries (LMICs) in Sub-Saharan Africa (SSA) [1]. Hypertension is a significant risk factor for stroke and ischemic heart disease, the world's deadliest maladies [2]. It is estimated that 30% of the SSA population have hypertension [3–5], 27% are aware of their hypertensive status, and only 7% have their hypertension under control [3]. The prevalence of hypertension in SSA will likely continue to rise due to the rapid shift to sedentary lifestyles, growing urbanization, and a higher number of people living longer [6, 7]. The level of preparedness of health systems for managing hypertension and related sequelae is poor and requires urgent attention [8, 9].

Several strategies have been implemented to manage hypertension in SSA. Population-based interventions such as educational campaigns to improve dietary practices by reducing salt consumption have proven cost-effective in lowering blood pressure among hypertensive patients [10–13]. Alternative interventions implemented to reduce dietary salt include increasing the availability and affordability of healthy foods and reformulation of processed foods with the help of government policies [10]. Other strategies including technology and non-technology based reminders targeted the hypertensive patients to improve their adherence to the prescribed pharmacologic and non-pharmacologic treatments [13, 14]. Despite the numerous, effective interventions targeting the patients with hypertension, the health systems are not equipped to provide the best quality care, yet, the health system is the current epicenter in the population-based hypertension [8, 9].

Multiple guidelines exist for screening, diagnosing, and treating hypertension [2, 15, 16]. The Pan-African Society of Cardiology task force convened in 2014 laid the roadmap to achieving 25% blood pressure control in Africa by 2025[17]. In 2021, the World Heart Federation laid an

updated roadmap that identified the major roadblocks in hypertension diagnosis and management and recommended solutions for reducing uncontrolled hypertension by 30% by 2030 [18]. The lack of local hypertension treatment guidelines, protocols, and policies on the procurement and distribution of anti-hypertensives are some of the multiple identified government and health system roadblocks to achieving hypertension control goals [17, 18]. These roadblocks likely result in the lack of community sensitization on hypertension and service inaccessibility through high-cost and centralized hypertension care [19, 20]. According to the Chronic Care Model, the health systems' role in hypertension management should be to support patients for self-management at home, set up systems to ensure patients follow up after clinical encounters, and decentralize hypertension care closest to patients [20, 21]. Health systems should provide access to specialists if needed, ensure providers are trained and have access to the latest guidelines and decision support, and document care to improve the quality of care [20, 21].

The World Health Organization (WHO) health systems framework highlights six critical elements to target while working to improve the quality of health services. These are the service delivery; health workforce; access to equipment, consumables, and technology; information systems; financing; and leadership and governance. In 2013, the WHO developed the Service Availability and Readiness Assessment (SARA) to map the progress in the six elements of the health systems[22]. The SARA tool has been extensively utilized in maternal and reproductive health and on a minimal basis in cardiovascular health care [23, 24]. The evidence on the health system determinants of hypertension care and outcomes is limited. The current review synthesizes the literature on the health system factors of hypertension care in SSA and identifies the gaps and opportunities for improving the quality of hypertension care.

## Methods

### Search Strategy:

Collaborating with a scientific library informationist, we defined the search terms for hypertension service availability and delivery guided by the WHO health systems' framework [25]. We Identified Medical Subject Headings (MeSH) terms ("Health Facilities," "Health Services Accessibility," "Health Care Delivery"); and hypertension ("hypertension" or "elevated blood pressure" or "raised blood pressure" or anti-hypertensive) in SSA. We searched PubMed, Cumulated Index to Nursing and Allied Health Literature (CINAHL), and Embase. The detailed list of search terms is in Supplementary File 1 (S-File 1).

### Study selection and eligibility

The Preferred Reporting Items for Systematic Reviews and Meta-Analyses (PRISMA) [26] guided this systematic review (S-File 2). We imported articles from the literature search into Covidence, and three investigators (SB, KA, and OO) conducted the title and abstract screening, full-text review, and final extraction. Two investigators appraised each article independently at each step, and the third investigator resolved any conflicts. Occasionally, the investigators discussed with the supervising faculty (YCM and CRH) to resolve disputes.

In the article search and screening, we included studies (1) published between January 2010 – June 2022; (2) conducted in health facility settings (hospitals, clinics, community health facilities) in SSA; (3) with randomized controlled trials, quasi-experimental, cohort study, case-control study, cross-sectional study designs, and quality improvement projects; (5) which explored the association between healthcare system factors and hypertension awareness, treatment initiation and adherence, and control. The delineation of the search to 2010 was

influenced by another systematic review conducted in 2013 exploring the influence of the health system on hypertension awareness, treatment, and control in LMICs [27].

We excluded studies (1) merely describing the prevalence of hypertension and associated patient-level factors, (2) which investigated the health system interventions without exploring association with any of the listed hypertension outcomes, and (3) which explored hypertension care interventions conducted solely in the community setting without describing collaboration with health facilities, or (3) examining patient-level behavioral change interventions for hypertension management. Additionally, we excluded gray literature (books, cases, etc.).

The investigators tracked the rationale for excluding any study during the entire process following the article search as reported in the PRISMA flowchart (Figure 1).

**[Insert Figure 1]**

## **Risk of Bias Assessment**

We used the Joanna Briggs Institute (JBI) tools to assess the quality aspects of the methods and conduct of the studies included in the review [28]. We evaluated the quality improvement study using the Standards for Quality Improvement Reporting Excellence 2.0 (SQUIREs) guideline [29]. SQUIREs uses a checklist of standard elements for reports of system-level projects to improve healthcare quality. Two investigators independently assessed the risk of bias for each study and the third resolved conflicts. The JBI tool uses "Yes," "No," and "Unclear or Not applicable" to assess the different features of study design and the overall appraisal as include study, exclude study, or seek more information. We replaced "Yes," "No," and "Unclear" with "Low risk of bias," high risk of bias," and "Some concerns," respectively. We assigned the overall quality appraisal of each study as "good," "fair," and "poor" and studies with poor quality were excluded. We used the robvis [30] online tool to create risk-of-bias plots where the overall

appraisal was also converted to "low risk of bias" for the study of good quality, "some concerns" for studies of fair quality and "high risk of bias" for studies of poor quality.

## Analysis and synthesis of findings

After the data extraction, we identified relevant themes of health system factors and interventions for hypertension care. We classified the outcomes of each study in the appropriate group: hypertension awareness, systolic and diastolic blood pressure (BP), treatment initiation and adherence, and BP control. We tracked which factors/interventions are likely to lead to better hypertension outcomes and compared findings across the different countries of SSA. We discussed the results against the other potential areas of health systems crucial to improving the quality of hypertension care as delineated in the WHO health systems framework [25].

## Results

We identified 7,494 studies, yet 3,121 were duplicates (Figure 1). We conducted title and abstract screening for 4,373 studies yielding 205 for full-text review. The latter led to 39 studies for inclusion in this systematic review (Table 1). The quality assessment demonstrated a low risk of bias in 62% (24/39) of the included studies (S-File 3). Given the nature and complexity of health system interventions, the compliance to all requirements of the study design raised some concerns in 38% (15/39) of the included studies. Among randomized controlled trials, the most common issues were the lack of concealed intervention allocation, the similarity of groups at baseline, and blinding participants and those delivering the intervention of the group assignments. The most common concern among cohort studies was the lack of identification and management of confounding factors and strategies to address participants' loss to follow-up. The identification and management of confounding factors was the most common reason for concern among cross-sectional studies.



162 **Fig 1. PRISMA diagram with flowchart of study screening and inclusion]**  
163

**Table 1. characteristics of studies examining the association between health system factors or interventions and hypertension outcomes (N=39)**

| Study                 | Country                 | Study Design                        | Population and Sample size                                                                                              | Health system factors/interventions explored |    |    |    |    |    |    |
|-----------------------|-------------------------|-------------------------------------|-------------------------------------------------------------------------------------------------------------------------|----------------------------------------------|----|----|----|----|----|----|
|                       |                         |                                     |                                                                                                                         | HF                                           | PD | AC | TS | QC | SC | SI |
| Adedapo, 2012[1]      | Nigeria                 | Cross-sectional study               | 116 patients with hypertension                                                                                          |                                              |    | *  |    |    |    |    |
| Adomako, 2021[2]      | Ghana                   | Cross-sectional study               | 485 patients with hypertension aged 25 to 80                                                                            |                                              |    | *  |    |    | *  |    |
| Akunne, 2019 [3]      | Nigeria                 | Cross-sectional study               | 1050 black patients with hypertension                                                                                   |                                              | *  |    |    |    |    |    |
| Ambaw, 2012 [4]       | Ethiopia                | Cross-sectional study               | 384 patients with hypertension                                                                                          |                                              |    | *  |    |    |    |    |
| Ameh, 2020 [5]        | South Africa            | Cross-sectional study               | 878 patients receiving treatment for HIV, hypertension, and diabetes in 12 health facilities in South Africa in 2011    |                                              |    |    |    | *  | *  |    |
| Asgedom, 2018 [6]     | Ethiopia                | Cross-sectional study               | 311 patients with hypertension                                                                                          |                                              |    | *  |    |    |    |    |
| Berhe, 2017 [7]       | Ethiopia                | Retrospective Cohort                | 897 patients with hypertension                                                                                          | *                                            |    |    |    |    |    |    |
| Birungi, 2021 [8]     | Tanzania and Uganda     | Cohort study                        | 2640 adults (18 years & older) with documented HIV infection and a diagnosis of either diabetes or hypertension or both |                                              | *  |    |    |    |    |    |
| Gala, 2020 [9]        | Botswana                | Cross-sectional study               | 389 patients with hypertension attending seven public health facilities                                                 | *                                            | *  |    |    |    |    | *  |
| Gausi, 2021 [10]      | South Africa            | Cohort study                        | 247 adults (18 years & older) with documented HIV infection and a diagnosis of either diabetes or hypertension or both  |                                              |    |    |    |    |    |    |
| Goudge, 2018 [11]     | South Africa            | Cluster Randomized Controlled Trial | 3978 patients at baseline receiving care at eight community health clinics                                              |                                              | *  |    | *  |    |    |    |
| Harrison, 2021 [12]   | Ghana                   | Cross-sectional study               | 310 patients with hypertension                                                                                          |                                              |    | *  |    |    |    |    |
| Hendriks, 2014 [13]   | Nigeria                 | Quasi-experimental study            | 1500 patients with hypertension                                                                                         |                                              |    | *  |    |    |    |    |
| Hickey, 2021 [14]     | Kenya and Uganda        | Randomized controlled trial         | 86,078 adults with uncontrolled hypertension                                                                            |                                              | *  | *  | *  |    |    |    |
| Kachimanga, 2021 [15] | Sierra Leone            | Cohort study                        | 982 with a new or prior hypertension or diabetes mellitus diagnosis                                                     |                                              | *  |    |    |    |    |    |
| Kande, 2014 [16]      | Botswana                | Quality improvement project         | 233 people from the general population attending the health clinic                                                      |                                              |    |    |    | *  | *  |    |
| Kingue, 2013 [17]     | Cameroon                | Randomized controlled trial         | 268 patients with hypertension who receive care at 30 health clinics                                                    |                                              | *  |    |    | *  |    |    |
| Kuria, 2018 [18]      | Kenya                   | Cross-sectional study               | 3861 patients with hypertension                                                                                         |                                              |    | *  |    |    |    |    |
| Labhardt, 2010 [19]   | Cameroon                | Pre- and post-quasi-experimental    | 79 primary health facilities                                                                                            |                                              | *  |    | *  | *  | *  |    |
| Lulebo, 2017 [20]     | Congo (Democratic Rep.) | Cross-sectional study               | 260 patients with hypertension at five general referral hospitals and nine health centers                               | *                                            |    |    |    | *  |    |    |
| Mashozhera, 2021 [21] | Namibia                 | Cross-sectional study               | 189 elderly patients (aged 60years and above), diagnosed with hypertension and on antihypertensive therapy              |                                              | *  |    |    | *  |    |    |
| Mbau, 2022 [22]       | Kenya                   | Cross-sectional study               | 663028adults (18 years & older)                                                                                         | *                                            |    |    |    |    |    |    |
| Mekonnen, 2017 [23]   | Ethiopia                | Cross-sectional study               | 409 adult patients>18 years with hypertension                                                                           |                                              |    | *  |    |    |    |    |
| Menyanu, 2021 [24]    | Ghana                   | Cross-sectional study               | 820 adults of 50 years and above with self-reported hypertension status                                                 |                                              |    | *  |    |    |    |    |
| Miselli, 2021 [25]    | Tanzania                | Cohort study                        | 542 adults (18 years & older) with hypertension                                                                         |                                              |    |    |    |    |    |    |
| Mlawanda, 2014 [26]   | Eswatini                | Cross-sectional study               | 60 adult patients>18 years with/out hypertension                                                                        |                                              | *  |    |    |    |    |    |
| Nelissen, 2018 [27]   | Nigeria                 | Pre- and post-quasi-experimental    | 336 adult patients with hypertension receiving medications at community pharmacies                                      |                                              | *  | *  | *  |    |    |    |
| Ogedegbe, 2018 [28]   | Ghana                   | Pragmatic randomized trial          | 640 patients with hypertensive and being followed at community health clinics                                           |                                              | *  | *  | *  |    |    |    |

| Study                | Country                        | Study Design                        | Population and Sample size                                | Health system factors/interventions explored |    |    |    |    |    |    |
|----------------------|--------------------------------|-------------------------------------|-----------------------------------------------------------|----------------------------------------------|----|----|----|----|----|----|
|                      |                                |                                     |                                                           | HF                                           | PD | AC | TS | QC | SC | SI |
| Ogola, 2019 [29]     | Kenya                          | Quasi-experimental study            | 132 health facilities                                     |                                              | *  |    |    | *  | *  |    |
| Otieno, 2021 [30]    | Ghana and Kenya                | Cohort Study                        | 1266 patients with hypertension at nine health facilities |                                              | *  | *  | *  |    |    |    |
| Pfister, 2020 [31]   | South Africa                   | Cross-sectional study               | 106 adults admitted for elective surgery                  |                                              | *  |    |    | *  |    |    |
| Pillay, 2021 [32]    | South Africa                   | Prevalence study                    |                                                           | *                                            |    |    |    |    |    |    |
| Ratnayake, 2021 [33] | Congo (Democratic Republic of) | Cohort study                        | 833 adults                                                | *                                            | *  |    |    |    | *  |    |
| Sarfo, 2020 [34]     | Ghana                          | Cross-sectional study               | 3927 stroke survivors with/out hypertension               | *                                            |    |    |    |    |    |    |
| Sharp, 2020 [35, 36] | Eswatini                       | Prevalence study                    | 1125 patients attending community clinics                 |                                              | *  | *  | *  |    |    |    |
| Steyn, 2013 [36]     | South Africa                   | Cluster Randomized Controlled Trial | 920 patients with hypertension                            |                                              |    |    |    | *  |    |    |
| Vedanthan, 2020 [37] | Kenya                          | Cohort study                        | 1051 adults with hypertension                             |                                              | *  | *  | *  |    | *  |    |
| Yan, 2017 [38]       | Zambia                         | Randomized stepped wedge design     | 35052 patients with hypertension                          |                                              | *  |    | *  | *  | *  |    |
| Zou, 2020 [39]       | Sierra Leone                   | Quasi-experimental – Mixed Methods  | 50 persons with hypertension and diabetes diagnosis       |                                              | *  |    | *  |    | *  |    |

**Abbreviations:** **HF** - Health facility type & capacity; **PD** - Provider knowledge and decision support; **AC** - Accessibility of care (cost, location, and time of services); **TS** - Task sharing/ shifting strategy; **QC** - Quality of care (deliberate improvement in care systems); **SC** - Supply chain (availability of essential equipment and consumables); **SI** - Services' cross-integration

## Country and design of included studies

Of the 39 included studies, six were randomized controlled trials conducted in South Africa (n=2) [31, 32], Cameroon (n=1) [33], Ghana (n=1) [34], Kenya and Uganda (n=1) [35], and Zambia (n=1) [36]. Five quasi-experimental studies were conducted in Nigeria (n=2)[37, 38], Cameroon (n=1) [39], Kenya (n=1) [40], and Sierra Leone (n=1) [41]. Eight cohort studies were conducted in Ethiopia (n=1) [42], Uganda and Tanzania (n=1) [43], Tanzania (n=1) [44], South Africa (n=1) [45], Sierra Leone (n=1) [46], Ghana and Kenya (n=1) [47], Kenya (n=1) [48], The Democratic Republic of the Congo (n=1) [49]. Nineteen cross-sectional studies were conducted in Ethiopia (n=3) [50–52], Nigeria (n=2) [53, 54], Botswana (n=1) [55], Democratic Republic of Congo (n=1) [56], Swaziland now called Eswatini (n=2) [57, 58], Namibia (1) [59], South Africa (n=3) [60–62], Ghana (n=4) [63–66], Kenya (n=2) [67, 68]. We additionally identified one quality improvement report from Botswana [69]. The geographic representation of included studies by country is demonstrated in Figure 2.

## Fig 2. Distribution of studies on health system factors of hypertension care in Sub-Saharan Africa

### Health system factors and interventions explored

The most studied health system factors were human resource factors – (1) healthcare providers' knowledge and adherence to hypertension treatment guidelines and decision support systems; and (2) the task-sharing/shifting of hypertension care tasks to unconventional health professionals. Other health system factors related to service delivery included (3) the health facility type and capacity and (4) service accessibility in terms of cost, place, and time of care (Table 2). Additionally, studies explored (5) supply chain management for access to essential equipment and anti-hypertensive medicines. Finally, studies explored the revision of the patient

care process at the health facility through (6) the cross-integration of services and (7) the different quality improvement strategies for improving hypertension care.

**Table 2. Health system factors and interventions explored and corresponding countries where they were conducted**

| Health system factor/interventions                                 | Number of studies | Country (number of studies)                                                                                                                                                                   |
|--------------------------------------------------------------------|-------------------|-----------------------------------------------------------------------------------------------------------------------------------------------------------------------------------------------|
| Health facility type and capacity                                  | 7                 | Ethiopia (1), Botswana (1), Democratic Republic of the Congo (2), Kenya (1), South Africa (1), Ghana (1)                                                                                      |
| Provider knowledge and decision-support                            | 20                | Nigeria (2), Tanzania (1), Uganda (2), Botswana (1), South Africa (2), Kenya (4), Sierra Leone (2), Cameroon (2), Namibia (1), Eswatini (1), Democratic Republic of the Congo (1), Zambia (1) |
| Accessibility of care (cost, location, and time of services)       | 15                | Ethiopia (3), Ghana (4), Kenya (3), Nigeria (3), Eswatini (1), Kenya and Uganda (1)                                                                                                           |
| Task-sharing/shifting strategy                                     | 10                | South Africa (1), Kenya and Uganda (1), Cameroon (1), Nigeria (1), Ghana and Kenya (1), Ghana (1), Kenya (1), Eswatini (1), Zambia (1), Sierra Leone (1)                                      |
| Quality of care (deliberate improvement of care systems)           | 10                | South Africa (3), Botswana (1), Cameroon (2), Democratic Republic of the Congo (1), Namibia (1), Kenya (1), Zambia (1)                                                                        |
| Supply chain (availability of essential equipment and consumables) | 10                | Ghana (1), South Africa (1), Botswana (2), Cameroon (1), Kenya (2), Democratic Republic of the Congo (1), Zambia (1), Sierra Leone (1)                                                        |
| Services cross-integration                                         | 8                 | South Africa (3), Tanzania and Uganda (1), Kenya and Uganda (1), Sierra Leone (1), Tanzania (1), Democratic Republic of the Congo (1)                                                         |

Note: Some studies reported more than one system factor

### **(1) Healthcare providers' knowledge and adherence to hypertension treatment guidelines and decision support system**

Half of the studies (21/39) [32–36, 38–41, 43, 46–49, 53, 55, 57–59, 61] across 13 countries explored the impact of healthcare provider knowledge of or adherence to hypertension treatment guidelines and decision support system on hypertension outcomes (Table 3). Generally, higher provider knowledge of or better adherence to guidelines and availability of decision-making support systems correlated with better hypertension care outcomes. For instance, the lack of physician knowledge in prescribing anti-hypertensives at a University College Hospital in Nigeria demonstrated 76% higher or lower blood level doses (as measured in urine) of anti-

209 hypertensives than recommended and contributed to 35% lower BP control [53]. Adherence to  
210 the Eighth Joint National Committee guidelines contributed to 46% of additional patients  
211 achieving BP control in Kenya [70]. An approximately similar pattern was observed in a study  
212 conducted in Botswana [55].

3 **Table 3. Studies examining the association between health system factors or interventions and hypertension outcomes (N=39)**

| Study             | Country             | Study Design          | Health system factors |     |     |     |     |     |     |                        | Outcomes and key findings                                                                                                                                                                           |                                                                                                                                                                                                                       |                                                                                                                                                                                                                                                                                                                                                                                                                           |    |
|-------------------|---------------------|-----------------------|-----------------------|-----|-----|-----|-----|-----|-----|------------------------|-----------------------------------------------------------------------------------------------------------------------------------------------------------------------------------------------------|-----------------------------------------------------------------------------------------------------------------------------------------------------------------------------------------------------------------------|---------------------------------------------------------------------------------------------------------------------------------------------------------------------------------------------------------------------------------------------------------------------------------------------------------------------------------------------------------------------------------------------------------------------------|----|
|                   |                     |                       | H F                   | P D | A C | T S | Q C | S C | S I | Hypertension awareness | Systolic/diastolic BP                                                                                                                                                                               | Hypertension treatment (initiation and adherence to-)                                                                                                                                                                 | BP Control                                                                                                                                                                                                                                                                                                                                                                                                                |    |
| Adedapo, 2012[1]  | Nigeria             | Cross-sectional       |                       |     | *   |     |     |     |     | NR                     | NR                                                                                                                                                                                                  | NR                                                                                                                                                                                                                    | After another cross-sectional study published in 2003 (n=114), a co-payment policy was implemented. Patients with full control of hypertension increased from 38% to 70% despite the co-payment policy.<br>Receiving 70-100% of drugs from the hospital was associated with 55% hypertension control vs. 31% when receiving less than 69% at University Health Service and 49% vs. 44% at Komfo Anokye Teaching Hospital. |    |
| Adomako, 2021[2]  | Ghana               | Cross-sectional       |                       |     | *   |     |     |     | *   | NR                     | NR                                                                                                                                                                                                  | NR                                                                                                                                                                                                                    |                                                                                                                                                                                                                                                                                                                                                                                                                           |    |
| Akunne, 2019 [3]  | Nigeria             | Cross-sectional       |                       | *   |     |     |     |     |     | NR                     | The higher number of drugs prescribed correlated positively with the increase in systolic and diastolic blood pressure (r=0.25 and 0.18 respectively, p<0.001) and                                  | NR                                                                                                                                                                                                                    | Overall BP control was 35%                                                                                                                                                                                                                                                                                                                                                                                                |    |
| Ambaw, 2012 [4]   | Ethiopia            | Cross-sectional       |                       |     | *   |     |     |     |     | NR                     |                                                                                                                                                                                                     | NR                                                                                                                                                                                                                    | Patients who travel for less than 30 minutes to the hospital had 2.02 times higher odds of adherence than their counterparts who travel for 30 minutes or more (95% CI: 1.19-3.43). The cost associated with adherence was not reported                                                                                                                                                                                   | NR |
| Ameh, 2020 [5]    | South Africa        | Cross-sectional study |                       |     |     |     | *   | *   | *   | NR                     | NR                                                                                                                                                                                                  | NR                                                                                                                                                                                                                    | The pilot facilities had a 3.6% greater chance of controlling BP than the comparison facilities during the 24 months of implementation of the ICDM model (coef. = 0.036; 95% CI: 0.029, 0.043; P<0.001).                                                                                                                                                                                                                  |    |
| Asgedom, 2018 [6] | Ethiopia            | Cross-sectional       |                       |     | *   |     |     |     |     | NR                     | NR                                                                                                                                                                                                  | Patients who reported paying a fee for medications were 50 times more likely to be non-adherent to the medications than the patients who received medications for free (aOR = 0.020, 95% CI = 0.003–0.117, p < 0.001) | NR                                                                                                                                                                                                                                                                                                                                                                                                                        |    |
| Berhe, 2017 [7]   | Ethiopia            | Cohort                | *                     |     |     |     |     |     |     | NR                     | NR                                                                                                                                                                                                  | NR                                                                                                                                                                                                                    | 242/363 (60%) achieved BP control in general as opposed to 93/199 (32%) in follow-up at the specialized clinics. The adjusted odds of BP control were 1.89 (95% CI 1.26 to 2.83) in general hospitals compared to specialized hospitals.                                                                                                                                                                                  |    |
| Birungi, 2021 [8] | Tanzania and Uganda | Cohort                |                       | *   |     |     |     |     | *   | NR                     | Mean (range) Systolic BP at baseline - 144.7 mmHg (68.7, 271.0); and 135.4 mmHg (26, 228) at end-line. Mean (range) diastolic BP at baseline - 90.2 (43.3–167.3) to 84.8 (44–185) mmHg at end-line. | NR                                                                                                                                                                                                                    | Baseline - 416 (38.3%); Endline - 476 (53.9%). Risk difference of uncontrolled hypertension (endline minus baseline) was 14.8% (10.5% to 19.2%; p<0.001); and 10.5% (5.7% to 15.3%; p<0.001) among people who were retained in care for more than 6 months                                                                                                                                                                |    |

| Study               | Country      | Study Design       | Health system factors |        |        |        |        |        |        |                                                                                                                                     | Outcomes and key findings                                                                                                                                                                                                                                                                                                                                                                                                                                             |                                                                                                                                                                                |                                                                                                                                                                                                                                                                                                                                                                                                                                                                                   |  |
|---------------------|--------------|--------------------|-----------------------|--------|--------|--------|--------|--------|--------|-------------------------------------------------------------------------------------------------------------------------------------|-----------------------------------------------------------------------------------------------------------------------------------------------------------------------------------------------------------------------------------------------------------------------------------------------------------------------------------------------------------------------------------------------------------------------------------------------------------------------|--------------------------------------------------------------------------------------------------------------------------------------------------------------------------------|-----------------------------------------------------------------------------------------------------------------------------------------------------------------------------------------------------------------------------------------------------------------------------------------------------------------------------------------------------------------------------------------------------------------------------------------------------------------------------------|--|
|                     |              |                    | H<br>F                | P<br>D | A<br>C | T<br>S | Q<br>C | S<br>C | S<br>I | Hypertension awareness                                                                                                              | Systolic/diastolic BP                                                                                                                                                                                                                                                                                                                                                                                                                                                 | Hypertension treatment (initiation and adherence to-)                                                                                                                          | BP Control                                                                                                                                                                                                                                                                                                                                                                                                                                                                        |  |
| Gala, 2020 [9]      | Botswana     | Cross-sectional    | *                     | *      |        |        |        | *      |        | NR                                                                                                                                  | NR                                                                                                                                                                                                                                                                                                                                                                                                                                                                    | NR                                                                                                                                                                             | Compared to the health posts, community clinics were three times more likely to have patients with uncontrolled hypertension (AOR=3.02 95% CI 1.35-6.73, p=0.007). Compared to the health post, the hospital clinic had the adjusted odds of uncontrolled BP of 0.90 (p=0.791). Medication errors were associated with 3.26 times higher odds of uncontrolled BP ( 95% CI 1.75-6.06 p<0.001).                                                                                     |  |
| Gausi, 2021 [10]    | South Africa | Cohort             |                       |        |        |        |        |        | *      | NR                                                                                                                                  | Mean systolic BP one year before integrated care: 139.9 mmHg (95% CI 136.9, 142.9 mmHg); at entry to integrated care: 132.1 mmHg (95% CI 129.7, 134.6 mmHg); one year after integrated care: 136.7 mmHg (95% CI (133.7, 139.6 mmHg). Mean diastolic BP 80.1 mmHg [95% CI (78.4, 81.9 mmHg)] at 1-year post-IC enrolment. Increasing diastolic BP 1-year post-Integrated Care enrolment compared to integrated care entry was not statistically significant (p=0.370). | Mean medication adherence before and after Integrated Care: 92.2% and 94.2% (p:0.223)                                                                                          | One year before integrated care - 43.4%; at integrated care entry, 58%; and at one-year post integrated care - 49.4%.                                                                                                                                                                                                                                                                                                                                                             |  |
| Goudge, 2018 [11]   | South Africa | RCT                |                       | *      |        | *      |        |        |        | There was no statistically significant difference awareness comparing intervention and control groups.                              | NR                                                                                                                                                                                                                                                                                                                                                                                                                                                                    | NR                                                                                                                                                                             | There was no statistically significant difference in BP control comparing intervention and control groups.                                                                                                                                                                                                                                                                                                                                                                        |  |
| Harrison, 2021 [12] | Ghana        | Cross-sectional    |                       |        | *      |        |        |        |        | NR                                                                                                                                  | NR                                                                                                                                                                                                                                                                                                                                                                                                                                                                    | NR                                                                                                                                                                             | Affordability of care was associated with hypertension control (OR, 1.917; 95% CI: 1.013-3.630), and coverage of medications by the National Health Insurance Scheme (NHIS) was more likely to result in hypertension control than out-of-pocket only or NHIS plus out-of-pocket payment (OR, 2.185; 95% CI 1.215-3.927). Patients' access to anti-hypertensive medications at the hospital was more likely to result in hypertension control (OR, 1.642; 95% C.I., 0.843-3.201). |  |
| Hendriks, 2014 [13] | Nigeria      | Quasi-experimental |                       |        | *      |        |        |        |        | From baseline to end-line, there was no significant difference in hypertension awareness between intervention and control settings. | NR                                                                                                                                                                                                                                                                                                                                                                                                                                                                    | From baseline to end-line, there was no significant improvement in patients' initiation of treatment in the intervention compared to the control settings (aOR: 1.37; p=0.69). | There was no significant improvement in the number of people achieving controlled BP in the program area compared to the control area. AOR 3.16 (95% CI 0.78 to 12.79 p=0.11).                                                                                                                                                                                                                                                                                                    |  |



| Study                  | Country                              | Study Design                | Health system factors |     |     |     |     |     |     |  | Outcomes and key findings                                                                                              |                                                                                                                                                                                                                               |                                                                                                                                                                                                                                                                                                                                                                    |                                                                                                                                                                                                                                                                                                                                                                                                                                                                |
|------------------------|--------------------------------------|-----------------------------|-----------------------|-----|-----|-----|-----|-----|-----|--|------------------------------------------------------------------------------------------------------------------------|-------------------------------------------------------------------------------------------------------------------------------------------------------------------------------------------------------------------------------|--------------------------------------------------------------------------------------------------------------------------------------------------------------------------------------------------------------------------------------------------------------------------------------------------------------------------------------------------------------------|----------------------------------------------------------------------------------------------------------------------------------------------------------------------------------------------------------------------------------------------------------------------------------------------------------------------------------------------------------------------------------------------------------------------------------------------------------------|
|                        |                                      |                             | H F                   | P D | A C | T S | Q C | S C | S I |  | Hypertension awareness                                                                                                 | Systolic/diastolic BP                                                                                                                                                                                                         | Hypertension treatment (initiation and adherence to-)                                                                                                                                                                                                                                                                                                              | BP Control                                                                                                                                                                                                                                                                                                                                                                                                                                                     |
| Hickey, 2021 [14]      | Kenya and Uganda                     | RCT                         |                       | *   | *   | *   |     |     | *   |  | Likelihood of patients linked to hypertension care following baseline screening (aRR 1.26; p:0.002, 95% CI 1.11, 1.42) | NR                                                                                                                                                                                                                            | NR                                                                                                                                                                                                                                                                                                                                                                 | 56% of intervention group participants and 43% of control group participants achieved hypertension control at year 3 (aRR 1.29; p < 0.001, 95% CI: 1.03 - 1.63)                                                                                                                                                                                                                                                                                                |
| Kachima nga, 2021 [15] | Sierra Leone                         | Cohort                      |                       | *   |     |     |     |     | *   |  | NR                                                                                                                     | NR                                                                                                                                                                                                                            | NR                                                                                                                                                                                                                                                                                                                                                                 | Hypertension control among patients with hypertension was 6% at baseline and 31% at follow-up (p<0.001). Among patients with comorbidity of diabetes mellitus: 10% at baseline to 28% at follow-up (p<0.01)                                                                                                                                                                                                                                                    |
| Kande, 2014 [16]       | Botswana                             | Quality improvement project |                       |     |     |     | *   | *   |     |  | NR                                                                                                                     | NR                                                                                                                                                                                                                            | NR                                                                                                                                                                                                                                                                                                                                                                 | The goal of achieving 70% BP control from 49% at baseline was met, but achieving BP control below 130/80mmHg of 70% from 16% at baseline was not met (27% at end-line).<br><br>Patients with the third stage of hypertension showed significant achievement of BP control in the intervention compared to control health facilities (39% vs. 50%; p= 0.004). There was no significant difference in BP control for patients with hypertension stages I and II. |
| Kingue, 2013 [17]      | Cameroon                             | RCT                         |                       | *   |     |     | *   |     |     |  | NR                                                                                                                     | NR                                                                                                                                                                                                                            | NR                                                                                                                                                                                                                                                                                                                                                                 |                                                                                                                                                                                                                                                                                                                                                                                                                                                                |
| Kuria, 2018 [18]       | Kenya                                | Cross-sectional             |                       |     | *   |     |     |     |     |  | NR                                                                                                                     | NR                                                                                                                                                                                                                            | Self-reported adherence to hypertension medications was 96% walkway, 94% facility, and 88% weekend. The logistic regression analysis showed that the OR of adherence to medications was 1.97 in walkway compared to health facility (95% CI 1.25-3.10), and those for the weekend were 76% times less likely to adhere to medications (AOR 0.24, 95% CI 0.10-0.57) | NR                                                                                                                                                                                                                                                                                                                                                                                                                                                             |
| Labhardt, 2010 [19]    | Cameroon                             | Quasi-experimental          |                       | *   |     | *   | *   | *   |     |  | NR                                                                                                                     | There was a decline of -26.5 mmHg (95% CI: -12.5 to -40.5) in systolic BP and -17.2 mmHg (95% CI: -7.1 to -27.3) in diastolic BP after full adjustment (comparing baseline and end-line after a median follow up of 3 months) | NR                                                                                                                                                                                                                                                                                                                                                                 | NR                                                                                                                                                                                                                                                                                                                                                                                                                                                             |
| Lulebo, 2017 [20]      | The Democratic Republic of the Congo | Cross-sectional             | *                     |     |     |     |     |     |     |  | NR                                                                                                                     | NR                                                                                                                                                                                                                            | NR                                                                                                                                                                                                                                                                                                                                                                 | 22% vs. 23% achieved BP control in general referral vs. health center, respectively, but the difference in BP control was not statistically significant. Eighteen percent of patients reported getting insufficient time with health care providers at the health centers compared                                                                                                                                                                             |

| Study                 | Country  | Study Design    | Health system factors |     |     |     |     |     |     |  | Outcomes and key findings                                                                                                                                                                                                                                                                                                                                                                                                                                          |                                                                                                                                                    |                                                                                                                                                                                                                                             |                                                                                                                                                                                                                                                                                                                                                                                                                                         |
|-----------------------|----------|-----------------|-----------------------|-----|-----|-----|-----|-----|-----|--|--------------------------------------------------------------------------------------------------------------------------------------------------------------------------------------------------------------------------------------------------------------------------------------------------------------------------------------------------------------------------------------------------------------------------------------------------------------------|----------------------------------------------------------------------------------------------------------------------------------------------------|---------------------------------------------------------------------------------------------------------------------------------------------------------------------------------------------------------------------------------------------|-----------------------------------------------------------------------------------------------------------------------------------------------------------------------------------------------------------------------------------------------------------------------------------------------------------------------------------------------------------------------------------------------------------------------------------------|
|                       |          |                 | H F                   | P D | A C | T S | Q C | S C | S I |  | Hypertension awareness                                                                                                                                                                                                                                                                                                                                                                                                                                             | Systolic/diastolic BP                                                                                                                              | Hypertension treatment (initiation and adherence to-)                                                                                                                                                                                       | BP Control                                                                                                                                                                                                                                                                                                                                                                                                                              |
| Mashozhera, 2021 [21] | Namibia  | Cross-sectional |                       | *   |     |     |     |     |     |  | NR                                                                                                                                                                                                                                                                                                                                                                                                                                                                 | NR                                                                                                                                                 | NR                                                                                                                                                                                                                                          | to 3% at the general referral hospitals. This difference was not reflected in the difference in achieving BP control. Compliance with Namibia Standard Treatment Guidelines was associated with 1.2 (p=0.571; 95% CI 0.7,2.1) crude odds of BP control. <b>Note:</b> There is universal healthcare in Namibia; consequently, patients do not have to pay for their anti-hypertensive medicines compared with several African countries. |
| Mbau, 2022 [22]       | Kenya    | Cross-sectional |                       | *   |     |     |     |     |     |  | Screening of hypertension comparing different levels of the health system - Community services screened 489,973 people - 19% prevalence - reference; Dispensary: screened 12,460 - 16.3% (PR: 0.85, 95% CI: 0.81, 0.88); Health centers screened 103,103 - 13.6% (PR: 0.70, 95% CI: 0.69, 0.72); Sub-county health facilities screened 50786 - 22.4% (PR: 1.16, 95% CI: 1.14, 1.18); county referral hospital screened 6706 - 30.4% (PR: 1.57, 95% CI: 1.51, 1.63) | NR                                                                                                                                                 | Patient initiation on treatment was as follows: The dispensary - 5.3%; health center - 25.6%; sub-county hospital - 32.9%; and county referral hospital - 36.2%. Overall retention on treatment was 31% at six months and 12% at 12 months. | BP control was as follows: Dispensary- 53% (Ref); Health centers: 47% - (0.89, 95% CI: 0.78 - 1.00); Sub- County hospital: 48% -( 0.92, 95% CI: 0.76 - 1.11); county referral hospital: 60% - (1.1, 95% CI: 0.92-1.32)                                                                                                                                                                                                                  |
| Mekonnen, 2017 [23]   | Ethiopia | Cross-sectional |                       |     | *   |     |     |     |     |  | NR                                                                                                                                                                                                                                                                                                                                                                                                                                                                 | NR                                                                                                                                                 | 130 Patients (44%) reported paying below 50 birrs (1.5 USD) a month and were two times more likely to adhere to medications compared to those who spent 50 birrs or more (aOR 2.02; p:<0.05; 95% CI 1.13-3.76).                             | NR                                                                                                                                                                                                                                                                                                                                                                                                                                      |
| Menyanu, 2021 [24]    | Ghana    | Cross-sectional |                       |     | *   |     |     |     |     |  | The odds of hypertension awareness among people with vs. without health insurance: 1.99 (p: 0.008; 95 %CI 1.19-3.33).                                                                                                                                                                                                                                                                                                                                              | Patients with health insurance had a 2.60 (p: 0.037; 95 % CI - 5.03 - (-0.16)) mmHg decline in diastolic BP than patients without health insurance | NR                                                                                                                                                                                                                                          | NR                                                                                                                                                                                                                                                                                                                                                                                                                                      |
| Miselli, 2021 [25]    | Tanzania | Cohort study    |                       |     | *   |     |     |     |     |  | NR                                                                                                                                                                                                                                                                                                                                                                                                                                                                 | NR                                                                                                                                                 | Lost to follow-up for hypertension care - without health insurance - 202/351, 57.5% vs. with health insurance 86/190, 45.3%,p= 0.008.                                                                                                       | Achieving BP control was more frequent in patients with compared to those without health insurance (46/84, 54.8% vs. - 43/124, 34.7%,p= 0.006)                                                                                                                                                                                                                                                                                          |
| Mlawanda, 2014 [26]   | Eswatini | Cross-sectional |                       | *   |     |     |     |     |     |  | NR                                                                                                                                                                                                                                                                                                                                                                                                                                                                 | NR                                                                                                                                                 | (9/60) 15% of patients were classified as requiring initiation or modification of treatment under                                                                                                                                           | NR                                                                                                                                                                                                                                                                                                                                                                                                                                      |

| Study                | Country                        | Study Design       | Health system factors |     |     |     |     |     |     |  | Outcomes and key findings                                                                                                                                                                                                                                     |                                                                                                                                                                                                                                                                                         |                                                                                                                                                                                                                                                     |                                                                                                                                                                                                                                                                                                        |
|----------------------|--------------------------------|--------------------|-----------------------|-----|-----|-----|-----|-----|-----|--|---------------------------------------------------------------------------------------------------------------------------------------------------------------------------------------------------------------------------------------------------------------|-----------------------------------------------------------------------------------------------------------------------------------------------------------------------------------------------------------------------------------------------------------------------------------------|-----------------------------------------------------------------------------------------------------------------------------------------------------------------------------------------------------------------------------------------------------|--------------------------------------------------------------------------------------------------------------------------------------------------------------------------------------------------------------------------------------------------------------------------------------------------------|
|                      |                                |                    | H F                   | P D | A C | T S | Q C | S C | S I |  | Hypertension awareness                                                                                                                                                                                                                                        | Systolic/diastolic BP                                                                                                                                                                                                                                                                   | Hypertension treatment (initiation and adherence to-)<br>pragmatic (real life) BP measurement conditions vs. not requiring treatment under standard mercury BP measurement.                                                                         | BP Control                                                                                                                                                                                                                                                                                             |
|                      |                                |                    |                       |     |     |     |     |     |     |  |                                                                                                                                                                                                                                                               |                                                                                                                                                                                                                                                                                         |                                                                                                                                                                                                                                                     |                                                                                                                                                                                                                                                                                                        |
| Nelissen, 2018 [27]  | Nigeria                        | Quasi-experimental |                       | *   | *   | *   |     |     |     |  | NR                                                                                                                                                                                                                                                            | NR                                                                                                                                                                                                                                                                                      | Out of 148 who responded to their adherence to medications, 40 patients showed high adherence, and 39 showed moderate adherence.                                                                                                                    | 153 of 232 (66%) who participated in the end-line interviews achieved the target and/or improvement in BP. Of those who showed moderate adherence to medications, 70.9% achieved target BP (aOR 1.57 p:0.257), while among patients with high adherence - 75.5% achieved target BP (aOR 2.27 p: 0.049) |
| Ogedegbe, 2018 [28]  | Ghana                          | RCT                |                       | *   | *   | *   |     |     |     |  |                                                                                                                                                                                                                                                               | In the intervention group, the mean Systolic BP reduction from baseline to 12 months was 20.4 mm Hg (95% CI: -25.2 to -15.6) as opposed to 16.8 mm Hg (95% CI -19.2 to -15.6) in the control group. The group's difference was significant (-3.6 mm Hg p = 0.021; 95% CI -6.1 to -0.5). | NR                                                                                                                                                                                                                                                  | There was no between-group statistically significant difference in achieving hypertension control in 12 months, 55% vs. 50% in the intervention and control, respectively [diff of 5.2%; 95% CI -1.8% to 12.4%].                                                                                       |
| Ogola, 2019 [29]     | Kenya                          | Quasi-experimental |                       | *   |     |     | *   | *   |     |  | 532,527 individuals screened for hypertension, and 50,957 were newly diagnosed (prevalence of 9.57%) within one year                                                                                                                                          | NR                                                                                                                                                                                                                                                                                      | Treatment initiation: 36806 of 50957 (72%) were initiated on treatment                                                                                                                                                                              | NR                                                                                                                                                                                                                                                                                                     |
| Otieno, 2021 [30]    | Ghana and Kenya                | Cohort             |                       | *   | *   | *   |     |     |     |  | NR                                                                                                                                                                                                                                                            | Systolic BP decreased by 9.4 mmHg (p<0.001) within 12 months from baseline.                                                                                                                                                                                                             |                                                                                                                                                                                                                                                     | The proportion of controlled Systolic BP increased from 46% at baseline to 77% at end-line (12 months) (p<0.001)                                                                                                                                                                                       |
| Pfister, 2020 [31]   | South Africa                   | Cross-sectional    |                       | *   |     |     | *   |     | *   |  | NR                                                                                                                                                                                                                                                            | NR                                                                                                                                                                                                                                                                                      | Patients initiated on treatment or had adjustment of treatment (55.5%; 95% CI, 46.2–65.1).                                                                                                                                                          | NR                                                                                                                                                                                                                                                                                                     |
| Pillay, 2021 [32]    | South Africa                   | Cross-sectional    | *                     |     |     |     |     |     |     |  | Significantly more patients were screened for hypertension at clinics than in hospitals, and the trends of the number of patients screened have increased at both clinics (6.5 to 11 million) and hospitals (approx. 200,000 to 1 million) from 2015 to 2018. | NR                                                                                                                                                                                                                                                                                      | A significantly higher number of patients were diagnosed and initiated on treatment at clinics than in hospitals, and the trends have increased from 36 to 67 thousand patients at clinics and 5 to 10 thousand at hospitals between 2014 and 2018. | NR                                                                                                                                                                                                                                                                                                     |
| Ratnayake, 2021 [33] | Congo (Democratic Republic of) | Cohort             | *                     | *   |     |     |     | *   | *   |  | Hypertension awareness: IRR of consultations for hypertension: 13.5 (p: 0.00, 95% CI 5.8-31.5).                                                                                                                                                               | Mean systolic BP was 133 (SD: 12.7), down from 161.1 (SD: 22.4) mmHg.                                                                                                                                                                                                                   | 220 (34%) of patients with hypertension remained in care; 71.4% of them achieved Systolic BP control;                                                                                                                                               | NR                                                                                                                                                                                                                                                                                                     |
| Sarfo, 2020 [34]     | Ghana                          | Cross-sectional    | *                     |     |     |     |     |     |     |  | NR                                                                                                                                                                                                                                                            | NR                                                                                                                                                                                                                                                                                      | NR                                                                                                                                                                                                                                                  | Risk factor of apparent treatment-resistant hypertension among patients with                                                                                                                                                                                                                           |

| Study                 | Country      | Study Design       | Health system factors |        |        |        |        |        |        | Outcomes and key findings |                                                                                                                                                                                                                                                                                                                                                                                                                     |                                                       |                                                                                                                                                                                                                                                                                                                                                  |
|-----------------------|--------------|--------------------|-----------------------|--------|--------|--------|--------|--------|--------|---------------------------|---------------------------------------------------------------------------------------------------------------------------------------------------------------------------------------------------------------------------------------------------------------------------------------------------------------------------------------------------------------------------------------------------------------------|-------------------------------------------------------|--------------------------------------------------------------------------------------------------------------------------------------------------------------------------------------------------------------------------------------------------------------------------------------------------------------------------------------------------|
|                       |              |                    | H<br>F                | P<br>D | A<br>C | T<br>S | Q<br>C | S<br>C | S<br>I | Hypertension awareness    | Systolic/diastolic BP                                                                                                                                                                                                                                                                                                                                                                                               | Hypertension treatment (initiation and adherence to-) | BP Control                                                                                                                                                                                                                                                                                                                                       |
|                       |              |                    |                       |        |        |        |        |        |        |                           |                                                                                                                                                                                                                                                                                                                                                                                                                     |                                                       | hypertension by health facility type - Secondary/Primary health facilities (reference); Tertiary health facilities: 1.26 (1.00 - 1.58). Risk factor of apparent treatment-resistant hypertension among stroke survivors by health facility type - Secondary/Primary health facilities (reference); Tertiary health facilities: 2.77 (1.41–5.46). |
| Sharp, 2020 [35, 36]  | Eswatini     | Cross-sectional    |                       | *      | *      | *      |        |        |        | NR                        | change in Systolic BP from first to fourth visit was -9.9 (95% CI: -13.2, -6.0; p: 0.01) mmHg and the change in diastolic BP was -4.7 (95% CI: -7.1, -2.3; p: 0.01) mmHg                                                                                                                                                                                                                                            | NR                                                    | Systolic BP above 140mmHg at the first and fourth visit was 57% and 39%, respectively, and diastolic BP above 90mmHg decreased from 29% to 18%.                                                                                                                                                                                                  |
| Steyn, 2013 [36]      | South Africa | RCT                |                       |        |        |        | *      |        |        | NR                        | Increased from 149.7/87.5 to 161/88 mmHg in the intervention as it was in the control group (152/86 to 158/87 mmHg).                                                                                                                                                                                                                                                                                                | NR                                                    | In the intervention group, uncontrolled BP increased from 69% to 76%, as it did in the control group from 73% to 74%.                                                                                                                                                                                                                            |
| Vedantha n, 2020 [37] | Kenya        | Cohort             |                       | *      | *      | *      |        | *      |        | NR                        | Change in systolic BP in three months among nurse-managed patients - slope 4.95 mmHg/month; clinical officer-managed patients - slope 5.28), no significant difference between groups. Change in diastolic BP in the first three months - Nurse-managed: slope, 2.37 (95% CI, 3.24 - 1.50); Clinical officer-managed - slope 2.45 (95% CI, 2.38 - 2.07). The difference in slopes was 0.08 (95% CI , 0.87 to 1.02). | NR                                                    | The ratio of BP control among Nurses-managed vs. clinical officer-managed patients was 0.80 (95% CI, 0.67 to 0.97).                                                                                                                                                                                                                              |
| Yan, 2017 [38]        | Zambia       | RCT                |                       | *      |        | *      | *      | *      |        | NR                        | NR                                                                                                                                                                                                                                                                                                                                                                                                                  | NR                                                    | Hypertension control was 12.9% at six months and plateaued at 25% at 42 months                                                                                                                                                                                                                                                                   |
| Zou, 2020 [39]        | Sierra Leone | Quasi-experimental |                       | *      |        | *      |        | *      |        | NR                        | The average diastolic BP was 98 mmHg at baseline vs. 86 mmHg in three months, t = 4.069, P= 0.001). The average Systolic BP decline was 15 mmHg from 172 mmHg (t = 1.701, p= 0.106).                                                                                                                                                                                                                                | NR                                                    | NR                                                                                                                                                                                                                                                                                                                                               |

**Abbreviations:** **HF** - Health facility type & capacity; **PD** - Provider knowledge and decision support; **AC** - Accessibility of care (cost, location, and time of services); **TS** - Task sharing/ shifting strategy; **QC** - Quality of care (deliberate improvement in care systems); **SC** - Supply chain (availability of essential equipment and consumables); **SI** - Services' cross-integration; **RCT** - Randomized controlled Trial; **NR** - Not reported; **CI** – Confidence Interval; **aOR** – Adjusted Odds Ratio

Improvement in the healthcare providers' skills and knowledge of the correct blood pressure measurement techniques and hypertension diagnosis, respectively, were effective in managing hypertension in Kenya [40]. In its first year, the program helped screen 532 527 individuals, diagnose almost 10% of them with hypertension, and initiate 72% of those diagnosed on treatment [40]. The provider skills in BP measurement were assessed in Eswatini by comparing the pragmatic measurements with standard sphygmomanometer measurements [57]. The two measurements showed a good agreement of 0.7 Kappa score and an 84% concurrence in hypertension treatment decisions (continuing, changing, adjusting, stopping treatment).

## **(2) Task-sharing/shifting strategy**

A quarter of studies (10/39) [32, 34–36, 38, 39, 41, 47, 48, 58] conducted in 9 countries explored the impact of delegating some hypertension care tasks to non-physician providers (task-shifting) or community health workers. The task-shifting consisted of training and giving roles to lay community health workers in South Africa [32] and Zambia [36] to conduct and record the BP measurements, to nurses in Cameroon [39] and Ghana [34] to treat hypertension (including prescribing drugs), and to pharmacists in Nigeria [38] to treat hypertension (prescribe medications) and dispense medications after diagnosis at the health facility. The impact of task-shifting varied across studies but bent towards positive BP outcomes. In Ghana [34] and Cameroon [39], task-shifting contributed to the significant decline in systolic and diastolic BP but not in the achievement of controlled BP [34, 39]. On the other hand, in the two quasi-experimental studies conducted in Nigeria and Zambia, respectively, the task-shifting contributed to the achievement of controlled BP in Nigeria (AOR 2.27, p: 0.049) from baseline to end line and in Zambia from 13% at baseline to 25% (no p-value reported) among patients who attended at least 2 follow up visits [36, 38]. In a cluster randomized controlled trial

conducted in South Africa, the task-shifting to lay community health workers in BP measurement and documentation contributed to higher adherence to appointments (75% vs. 56% patients attending their assigned appointments) but no statistically significant improvements in achieving BP control comparing the intervention to the control group [32].

### **(3) Health facility type and capacity**

Eighteen percent (7/39) of the included studies [42, 49, 55, 56, 62, 65, 68] explored the impact of health facility type and capacity on hypertension care and outcomes. The studies highlighted the significant yet inconsistent differences in hypertension outcomes associated with receiving care at either community health post (closer to the community - offering one or very few primary healthcare services), community health center (serving a slightly bigger size of the community - offers the whole package of primary care services), general referral hospital, or specialized clinics. In Botswana, community health posts were three times better than community health clinics in helping patients achieve BP control [55]. In Ethiopia, general referral clinics were almost two times better than specialized clinics [42] in patients' achievement of BP control. In the Democratic Republic of Congo, there were no significant differences in BP outcomes between general referral hospitals and community health centers [56]. Additionally, the presence of the doctor on a daily basis (OR:1.64; 95% CI:1.17-2.31;  $p=0.004$ ) and a higher mean number of nurses in the clinic (OR: 1.15; 95% CI:1.08-1.23;  $p=0.001$ ) were significantly associated with BP control at the baseline of a randomized controlled trial conducted in South Africa [71].

### **(4) Accessibility of hypertension care (cost, geographic, temporality of service delivery)**

The effect of patients' access to hypertension care on hypertension outcomes was explored in 38% (15/39) of the included studies within seven SSA countries [34, 35, 37, 38, 47, 48, 50–52, 54, 58, 63, 64, 66, 67]. The general trend was that the lower cost of care was significantly

associated with better hypertension outcomes. The two quasi-experimental studies conducted in Nigeria and Ghana provided health insurance coverage to the intervention group and to both study arms, respectively [34, 37]. In both studies, the systolic and diastolic BP declined in both study arms with a significant and sharper decline in the intervention arms even though the achievement of BP control was not significantly different in the intervention versus control arms. Two cross-sectional studies in Ethiopia reported that patients' payment of user fees was associated with 50 times higher odds of uncontrolled BP while paying less than 50 Ethiopian Birr (approximately 1 USD) was associated with two-fold higher odds of achieving BP control [50, 52].

Four studies reported the factors related to the spatial and temporality accessibility of hypertension care services in achieving BP control. The shorter distance to the health facilities [51] and time flexibility at the hypertension care clinics were associated with better hypertension care outcomes [67]. Yet, such patterns were not true in South Africa, where rural dwellers (where people are likely to travel longer to health facilities) were better responders to treatment intensification by achieving BP control compared to urban dwellers (OR: 0.66; 95% CI: 0.45-0.97; p:0.034) [71]. In Ethiopia, traveling less than 30 minutes to the hospital had 2.02 times higher odds of medication adherence compared to traveling 30 minutes or more [51]. Similarly, the flexibility in location (other than at the health facility) and time of day of dispensing medications were associated with better health outcomes, as reported in Kenya [67] and Nigeria. [38] In Kenya, the extension of hypertension service hours to include evening hours led to a two times likelihood of patients' adherence to anti-hypertensive medications even though patients scheduled to attend weekend clinics had 76% fewer odds of medication adherence [67].



## **(5) Supply chain management for the availability of essential equipment and**

### **consumables**

A quarter (10/39) of the studies [36, 39–41, 48, 49, 55, 66, 67, 69] across eight countries explored the availability of equipment and consumables involved in hypertension management and impact on BP outcomes. The procurement of drugs and consumables and improvement in the supply chain implemented in the experimental studies and quality improvement project was in combination with other interventions such as providers' training in Cameroon, Kenya, and Zambia [36, 39, 40], and better data management in Botswana [69]. In these studies, the impact of the equipment and supply chain was not necessarily isolated but undoubtedly contributed to the overall improvements in BP outcomes.

The cross-sectional study conducted in Botswana reported that the medication errors contributed to three times higher odds (Odds Ratio: 3.23; 95% CI 1.75-6.06  $p < 0.001$ ) of uncontrolled BP. Almost one-third of the errors were dispenser errors caused mainly by the stock out of the medication and reluctance to refer the patients back to the prescriber to provide an alternative medicine [55]. The interventions that showed significant improvement in BP improved not only the availability of the equipment but also the essential anti-hypertensive drugs, as is the case in Kenya [40].

## **(6) Cross-integration of services**

The integration of hypertension and other non-communicable diseases services into the well-established health services was explored in 18% (7/39) of the studies in 6 different countries [35, 43, 45, 46, 49, 60, 61]. The most frequent form of cross-integration was the provision of non-communicable diseases services in the Human Immunodeficiency Virus (HIV) and Sexually



Transmitted Diseases clinics and the use of existing patient follow-up mechanisms in managing non-communicable diseases.

Predominantly, the cross-integration of services has shown significant improvements in hypertension control. A cohort of patients in South Africa increased in controlled BP from 43% before integration of services to 49% one year after integration [45]. Another cohort of patients in Uganda and Tanzania had a 10% decline in the risk of uncontrolled BP [43]. In Uganda and Kenya, the care for hypertension, diabetes, and HIV were integrated, and additional features of care improved, leading to a 26% higher likelihood of initiating patients on hypertension treatment and a 29% higher likelihood of BP control. In the Democratic Republic of the Congo, hypertension services were integrated into Emergency Primary Clinic. While there was a high rate of new hypertension diagnoses in 97% of the included sample, only 34% remained in care in one year, and other those who remained in care, 71% achieved a systolic BP below 140 mmHg, which is the cut-off used in the country for desired systolic BP [49].

In one instance, the hypertension clinic was built from scratch in Sierra Leone [46]. A cohort of patients followed in that new rural hypertension clinic had BP control go from 6% at baseline to 31% at one year-follow-up [46].

# **(7) Deliberate improvement in the quality of hypertension care**

Eight studies [31, 33, 36, 39, 40, 60, 61, 69] conducted in 5 countries explored the additional value of deliberately gauging and improving systems for a better quality of hypertension care.

The quality improvement projects included an improved data recording process in Zambia and Botswana [36, 69] and better monitoring through supervision in Cameroon [33] and South Africa [31]. In South Africa, a quality improvement project on improving data recording and adherence to treatment guidelines by providers was implemented through the introduction of a folded

guidelines sheet inside the patient file [31]. The project did not contribute to an increase in patients with BP control, and providers reported that the project was overwhelming because of staff shortage [31]. Where quality improvement was implemented jointly with other system components such as improving the supply chain of equipment and consumables in Botswana [69]; providers' training on hypertension care and task-shifting in Cameroon [33, 39]; supply chain, training, and task-shifting in Zambia [36]; there were better blood pressure outcomes.

## Discussion

This systematic review aimed to assess the health system factors and interventions for hypertension awareness, initiation and adherence to hypertension treatment, and achievement of controlled blood pressure in SSA. A 2013 systematic review in LMICs [27] and a 2015 narrative synthesis in SSA [72] explored the health system determinants of hypertension care and reported consistent findings of factors of hypertension outcomes: cost of care, human resources factors such as adherence to protocols, physical resources factors such as lack of functioning equipment, and lack of treatment guidelines. Our review identified the above and additional health system interventions and factors, including the accessibility factors of care such as place and time of care, the health facility type and capacity, the use of quality improvement strategies, and the cross integration of services.

The healthcare provider's knowledge and adherence to hypertension treatment guidelines stood out as one of the most studied health system interventions [40, 73, 74]. The capacity building among healthcare providers and the task sharing and shifting of hypertension management roles to vital professionals like nurses, pharmacists, and community health workers align with scientific evidence from developing and developed countries [75, 76]. For instance, the nurses'

role in managing hypertension has evolved from merely measuring and monitoring blood pressure to collaboratively detecting, diagnosing, and referring patients with hypertension and its complications [77, 78]. In many countries and settings, nurses prescribe or dispense anti-hypertensive medications, provide patient education and counseling to ensure medication adherence, and assume leadership roles in spearheading quality improvement projects for better management of hypertension [77]. An estimation of the global gap in clinic visits for hypertension care reported that 50% of LMICs and 86% of lower-income countries have a physician deficit even if patients were to make only three annual visits to the health facilities for their hypertension [79]. Neupane and colleagues recommend shifting some hypertension management tasks to non-physician clinicians to bridge that gap [79]. Interdisciplinary collaboration is the way forward for SSA to provide quality hypertension care to patients; however, regional and national policies must align with and support best practices.

The cross integration of hypertension services is another system-level intervention explored for the management of hypertension. The hypertension services have been frequently integrated with HIV clinics, and this strategy has demonstrated to be effective in helping patients achieve controlled blood pressure in Sierra Leone [46], South Africa [45], and Tanzania and Uganda [43], to name a few examples. There are some reasons why taking lessons from the management of chronic infectious diseases could be effective in hypertension care. The management of chronic infectious diseases, HIV and Tuberculosis, in resource-constrained settings has, despite still-existing challenges, produced strong evidence and effective strategies for managing patients with such complicated chronic health conditions amid, just to name a few; insufficient healthcare professionals [80], inaccessibility of health services [81], and poor information management systems [82]. In addition to demonstrating that task sharing with and task shifting to non-

physician healthcare providers is possible and effective [80, 83, 84], the process of managing HIV and Tuberculosis has also demonstrated ways to manage loss to follow up by the use of strong information management systems [82], decentralization of services close to the community [85], and collaboration with community health workers [80, 84]; all the strategies that could be well adapted to hypertension management. One of the information management system strategies that have been effective in HIV and Tuberculosis control and hypertension management in other low-income countries is the patient registries [86–89]. The current review did not find studies exploring patient registries to prevent loss to follow-up in hypertension management.

The hypertension clinics model consists of managing patients with hypertension in their own outpatient unit and was experimented and proved effective in Sierra-Leone [46] and Eswatini [58]. The premise of this strategy is to have well trained healthcare providers and good systems of data management, in some instances to decentralize of hypertension care, and improvement in patient follow-up. The lessons from the management of HIV and Tuberculosis could be applied in those services. It is crucial to ensure that the detachment of hypertension care from the general outpatient department or from the well-equipped hospital does not hamper the patients' initiation on hypertension treatment through the internal transfer processes and that patients with hypertension continue to receive holistic care for other health problems they might have in addition to hypertension.

While the decentralization of care might address geographic barriers to hypertension care access, other factors of accessibility such as cost of care and time of services require additional and potentially different interventions. Extensively, the current and previous literature have shown that the high direct and indirect costs of care hamper patients' use of health services and lead to

poor health outcomes and among patients with hypertension, poor blood pressure control [54, 66, 90]. The time of operation of clinics, though limited evidence exists, has an impact on the staffing hence the long queues of patients at the in- and outpatient departments which discourages patients' attendance to their appointments and encourages loss to follow-up [67, 91, 92]. Universal health coverage through government-subsidized insurance premiums has been advocated as a solution to prevent catastrophic spending on healthcare services and associated poor health outcomes [93–95], and the 24/7 hypertension clinic operation could be explored as a potential intervention to the long waiting queues at the clinics. The financing of universal health coverage and the 24/7 open clinics, however, require political buy-in and collaboration across sectors, local and international [94].

While leadership and governance are central to the success of any endeavor to improve the quality of care, their role and impact in advancing hypertension care in SSA are not widely researched, and the few existing studies are predominantly of poor quality [96]. Thornton highlighted the critical values of leadership commitment, willingness to fund care, strategic and creative local and foreign partnerships, and evidence-based guidelines as the key reasons why Botswana surpassed the United Nations' HIV management goals of 95% awareness, 95% on treatment, and 95% [81]. A 3-year campaign mobilization on the role of clinical leaders in hypertension management at various health systems in the United States achieved the goal of 80% blood pressure control within seven months [97]. A scoping review of interventions to strengthen the health professionals' leadership in SSA found that the opportunities for leadership development in SSA are scarce and those available are of poor quality and lacking a consistent evaluation framework [98]. There is a need for more studies on strengthening leadership in healthcare and exploring its impact on health outcomes, including hypertension in SSA.

As the burden of hypertension increases globally, the investment required of health systems to manage hypertension is rising. Hypertension is significantly associated with adverse outcomes of Coronavirus Disease 2019 (COVID-19), the ongoing pandemic ravaging the entire world's health systems [99, 100]. Studies reported that hypertensive patients had almost three times the odds of mortality compared to people without hypertension [99]. The long-term post-COVID symptoms haunt the patients with hypertension who survive COVID-19 more than the general population [101]. For instance, patients with hypertension are twice as likely to have migraine-like headaches and 68% higher odds of poor sleep than people without hypertension [101]. Apart from the COVID-19 rationale, under the Sustainable Development Goal (SDG) 3 (Ensure healthy lives and promote well-being for all at all ages), target 3.4 aims to reduce by one-third the premature mortality from non-communicable diseases [102]. The management of hypertension, a significant risk factor for cardiovascular diseases, is a step closer to achieving target 3.4 of SDG 3.

Standard tools for exploring the health system determinants for specific diseases are scarce in the realm of hypertension care in Africa. There is a dire need for psychometric tools to explore health system readiness to provide quality hypertension care. The availability of those tools would open doors to researchers interested in hypertension care to gather quality data on health system determinants and render the evidence to policymakers to develop policies directed at shortfalls in care delivery to improve the health outcomes of patients with hypertension.

Future studies are recommended to explore the roles of leadership and governance and information systems at the health facilities levels as well as multi-level approaches (ie, individual, community, provider, health system) in the improvement of hypertension care [27, 72]. Additionally, while the current review explored studies conducted in SSA, most of the

studies were conducted in three countries (Ethiopia, South Africa, and Ghana). Future studies should explore hypertension service readiness in other countries of SSA. The expansion of studies exploring health system factors of hypertension care could be a way to highlight the areas of need to advocate for support from local and international health agencies.

## **Strengths and Limitations**

The strengths of the current review are the holistic view of health system factors and interventions that affect the quality of hypertension service delivery, stringent critique of the quality of the studies, and the overall derivation conclusion against the WHO framework [25]. Nevertheless, the current review included only studies published in English and did not include the gray literature, which could consist of unpublished reports, and quality improvement projects on the health system interventions to improve hypertension service delivery. While the review attempted to isolate the effect of the individual health system factors, many system interventions were delivered in a bundled approach which rendered the isolation impossible.

## **Conclusion**

The literature exploring health system factors of hypertension outcomes in SSA is limited in volume and quality. The combination of multiple health system interventions was likely to result in better hypertension outcomes. More rigorously designed studies about the different aspects of the health systems and their impact on hypertension outcomes, especially the health information management and leadership and management are needed in SSA to inform effective hypertension control efforts.

## **List of abbreviations**

CINAHL: Cumulated Index to Nursing and Allied Health Literature

467 JBI: Joanna Briggs Institute  
 468 HIV: Human Immunodeficiency Virus  
 469 LMIC: Low- and Middle-Income Countries  
 470 PRISMA: Preferred Reporting Items for Systematic Reviews and Meta-Analyses  
 471 SARA: Service Availability and Readiness Assessment  
 472 SDG: Sustainable Development Goals  
 473 COVID-19: Coronavirus Disease 2019  
 474 SQUIRES: Standards for Quality Improvement Reporting Excellence  
 475 SSA: Sub-Saharan Africa  
 476 WHO: World Health Organization

## 477 **Declarations**

### 478 **Ethics approval and consent to participate**

479 The current study did not involve human subject research, and the ethical approval or consent to  
 480 participate is not applicable

### 481 **Consent for publication**

482 All authors reviewed and approved the final manuscript for publication

### 483 **Competing interest**

484 We have no conflict of interest to declare

### 485 **Funding**

486 Not applicable



## **Authors' contributions**

SB: Idea conception, literature search, title, and abstract review, full-text review, quality assessment, data extraction, analysis, and drafting of the manuscript

OO: Full-text review, quality assessment, manuscript drafting

FSS: Critical manuscript review, field expertise incorporation in the discussion of findings

YCM: Critical manuscript review, language editing, supervision

KA: Full-text review, quality assessment, data extraction, analysis, and revision of the manuscript

CRH: Idea conception, design of literature search and inclusion and exclusion criteria, critical manuscript review, language editing, supervision

## **Acknowledgments**

We acknowledge the support of Stella Seal, the Library Informationist who helped in searching the databases, Dr. Sarah Szanton and Dr. William E. Rosa for the contribution of ideas in project ideation and discussion of findings, and Dr. Emmanuel Uwiringiyimana for the assistance in the full-text screening.

## **Authors' information**

### **Samuel Byiringiro**

Ph.D. Candidate at Johns Hopkins University School of Nursing  
525 N Wolfe St, Baltimore, Maryland, 21205  
United States

### **Oluwabunmi Ogungbe**

Post-doctoral fellow at Johns Hopkins University School of Nursing  
525 N Wolfe St, Baltimore, Maryland, 21205

510 United States

511 **Yvonne Commodore-Mensah**

512 Associate Professor at Johns Hopkins University School of Nursing

513 525 N Wolfe St, Baltimore, Maryland, 21205

514 United States

515 **Khadijat Adeleye**

516 Ph.D. Student at the University of Massachusetts

517 Elaine Marieb College of Nursing

518 Amherst, Massachusetts, 01002

519 United States of America

520 **Fred Stephen Sarfo**

521 Professor of Medicine at Kwame Nkrumah University of Science & Technology, Department of

522 Medicine

523 Accra Rd, Kumasi, Ghana

524 Clinician at Komfo Anokye Teaching Hospital

525 Okomfo Anokye Road, Kumasi, Ghana

526

527 **Cheryl R. Himmelfarb**

528 Sarah E. Allison Endowed Professor and Vice Dean for Research, Johns Hopkins University

529 School of Nursing, Joint Appointments in Schools of Medicine and Public Health

530 525 N Wolfe St, Baltimore, Maryland, 21205

531 United States

532 **Supporting information**

533 Fig 1. PRISMA diagram with flowchart of study screening and inclusion

534 Fig 2. Distribution of studies on health system factors of hypertension care in Sub-Saharan  
535 Africa

536  
537 S-File 1. Search terms

538 S-File 3. PRISMA 2009 checklist

539 S-File 3. JBI Quality Assessment Results

540 S-File 4. Standards for Quality Improvement Reporting Excellence

541

542

# References

- [1] World Health Organization (WHO). Hypertension Facts Sheet, <https://www.who.int/news-room/fact-sheets/detail/hypertension> (accessed 7 October 2020).
- [2] Whelton PK, Carey RM, Aronow WS, et al. 2017 ACC/AHA/AAPA/ABC/ACPM/AGS/APhA/ASH/ASPC/NMA/PCNA Guideline for the Prevention, Detection, Evaluation, and Management of High Blood Pressure in Adults. *J Am Coll Cardiol* 2018; 71: e127 LP-e248.
- [3] Ataklte F, Erqou S, Kaptoge S, et al. Burden of undiagnosed hypertension in sub-saharan Africa: a systematic review and meta-analysis. *Hypertension* 2015; 65: 291–298.
- [4] Guwatudde D, Nankya-Mutyoba J, Kalyesubula R, et al. The burden of hypertension in sub-Saharan Africa: A four-country cross sectional study. *BMC Public Health* 2015; 15: 1211.
- [5] Desormais I, Amidou SA, Houehanou YC, et al. The prevalence, awareness, management and control of hypertension in men and women in Benin, West Africa: The TAHES study. *BMC Cardiovasc Disord* 2019; 19: 303.
- [6] van de Vijver S, Akinyi H, Oti S, et al. Status report on hypertension in Africa - Consultative review for the 6th Session of the African Union Conference of Ministers of Health on NCD's. *Pan African Medical Journal* 2013; 16: 1937–8688.
- [7] Twagirumukiza M, De Bacquer D, Kips JG, et al. Current and projected prevalence of arterial hypertension in sub-Saharan Africa by sex, age and habitat: An estimate from population studies. *Journal of Hypertension* 2011; 29: 1243–1252.
- [8] Adinan J, Manongi R, Temu GA, et al. Preparedness of health facilities in managing hypertension & diabetes mellitus in Kilimanjaro, Tanzania: a cross sectional study. *BMC Health Serv Res* 2019; 19: 537.
- [9] Deuboué Tchialeu RI, Yaya S, Labonté R. Health Systems Readiness to Manage the Hypertension Epidemic in Primary Health Care Facilities in the Western Cape, South Africa: A Study Protocol. *JMIR Res Protoc* 2016; 5: e35.
- [10] Muthuri SK, Oti SO, Lilford RJ, et al. Salt reduction interventions in sub-Saharan Africa: A systematic review. *PLoS ONE* 2016; 11: e0149680.
- [11] Ireland DM, Clifton PM, Keogh JB. Achieving the Salt Intake Target of 6 g/Day in the Current Food Supply in Free-Living Adults Using Two Dietary Education Strategies. *J Am Diet Assoc* 2010; 110: 763–767.
- [12] Adeyemo AA, Prewitt TE, Luke A, et al. The feasibility of implementing a dietary sodium reduction intervention among free-living normotensive individuals in south west Nigeria. *Ethn Dis* 2002; 12: 207–212.
- [13] Cappuccio FP, Miller MA. Cardiovascular disease and hypertension in sub-Saharan Africa: burden, risk and interventions. *Intern Emerg Med* 2016; 11: 299–305.
- [14] Ogungbe O, Byiringiro S, Adedokun-Afolayan A, et al. Medication Adherence Interventions for Cardiovascular Disease in Low-and Middle-Income Countries: A Systematic Review. *Patient Prefer Adherence* 2021; 15: 885.
- [15] Whelton PK, Williams B. The 2018 European Society of Cardiology/European Society of Hypertension and 2017 American College of Cardiology/American Heart Association Blood Pressure Guidelines: More Similar Than Different. *JAMA - Journal of the American Medical Association* 2018; 320: 1749–1750.

- [16] Armstrong C. JNC 8 guidelines for the management of hypertension in adults. *American Family Physician* 2014; 90: 503–504.
- [17] Dzudie A, Rayner B, Ojji D, et al. Roadmap to achieve 25% hypertension control in Africa by 2025. *Cardiovasc J Afr* 2017; 28: 262–273.
- [18] Jeemon P, Séverin T, Amodeo C, et al. World heart federation roadmap for hypertension – A 2021 update. *Glob Heart* 2021; 16: 63.
- [19] Nulu S, Aronow WS, Frishman WH. Hypertension in Sub-Saharan Africa: A Contextual View of Patterns of Disease, Best Management, and Systems Issues. *Cardiol Rev* 2016; 24: 30–40.
- [20] Wagner EH. Chronic disease management: what will it take to improve care for chronic illness? *Effective clinical practice*: ECP 1998; 1: 2–4.
- [21] Crisp N. Health is made at home, hospitals are for repairs: Building a healthy and health-creating society.
- [22] World Health Organization (WHO). Service Availability and Readiness Assessment (SARA): An annual monitoring system for service delivery - Reference Manual, Version 2.2. *Health Statistics and Information Systems* 2015; 175.
- [23] Kozuki N, Oseni L, Mtimuni A, et al. Health facility service availability and readiness for intrapartum and immediate postpartum care in Malawi: A cross-sectional survey. *PLoS One*; 12. Epub ahead of print 1 March 2017. DOI: 10.1371/journal.pone.0172492.
- [24] Kanyangarara M, Chou VB, Creanga AA, et al. Linking household and health facility surveys to assess obstetric service availability, readiness and coverage: Evidence from 17 low- and middle-income countries. *J Glob Health*; 8. Epub ahead of print 2018. DOI: 10.7189/jogh.08.010603.
- [25] WHO. Monitoring the Building Blocks of Health Systems: a Handbook of Indicators and. 2010; 110.
- [26] Moher D, Liberati A, Tetzlaff J, et al. Preferred reporting items for systematic reviews and meta-analyses: The PRISMA statement. *BMJ (Online)* 2009; 339: 332–336.
- [27] Maimaris W, Paty J, Perel P, et al. The Influence of Health Systems on Hypertension Awareness, Treatment, and Control: A Systematic Literature Review. *PLoS Med*; 10. Epub ahead of print 2013. DOI: 10.1371/journal.pmed.1001490.
- [28] Aromataris E and Munn Z. JBI Reviewer 's Manual. *The Joanna Briggs Institute* 2017; 32.
- [29] Ogrinc G, Davies L, Goodman D, et al. SQUIRE 2.0 (&lt;em&gt;Standards for QUality Improvement Reporting Excellence&lt;/em&gt;: revised publication guidelines from a detailed consensus process. *BMJ Quality & Safety* 2016; 25: 986 LP – 992.
- [30] McGuinness LA, Higgins JPT. Risk-of-bias VISualization (robvis): An R package and Shiny web app for visualizing risk-of-bias assessments. *Res Synth Methods*; n/a. Epub ahead of print 26 April 2020. DOI: 10.1002/jrsm.1411.
- [31] Steyn K, Lombard C, Gwebushe N, et al. Implementation of national guidelines, incorporated within structured diabetes and hypertension records at primary level care in Cape Town, South Africa: a randomised controlled trial. *Glob Health Action* 2013; 6: 20796.
- [32] Goudge J, Chirwa T, Eldridge S, et al. Can lay health workers support the management of hypertension? Findings of a cluster randomised trial in South Africa. *BMJ Glob Health* 2018; 3: e000577–e000577.

- [33] Kingue S, Angandji P, Menanga AP, et al. Efficiency of an intervention package for arterial hypertension comprising telemanagement in a Cameroonian rural setting: The TELEMED-CAM study. *Pan Afr Med J* 2013; 15: 153.
- [34] Ogedegbe G, Plange-Rhule J, Gyamfi J, et al. Health insurance coverage with or without a nurse-led task shifting strategy for hypertension control: A pragmatic cluster randomized trial in Ghana. *PLoS Med* 2018; 15: 1–17.
- [35] Hickey MD, Ayieko J, Owaraganise A, et al. Effect of a patient-centered hypertension delivery strategy on all-cause mortality: Secondary analysis of SEARCH, a community-randomized trial in rural Kenya and Uganda. *PLoS Med* 2021; 18.
- [36] Yan LD, Chirwa C, Chi BH, et al. Hypertension management in rural primary care facilities in Zambia: a mixed methods study. *BMC Health Serv Res* 2017; 17: 111.
- [37] Hendriks ME, Wit FWNMM, Akande TM, et al. Effect of health insurance and facility quality improvement on blood pressure in adults with hypertension in Nigeria: a population-based study. *JAMA Intern Med* 2014; 174: 555–563.
- [38] Nelissen HE, Cremers AL, Okwor TJ, et al. Pharmacy-based hypertension care employing mHealth in Lagos, Nigeria - a mixed methods feasibility study. *BMC Health Serv Res* 2018; 18: 934.
- [39] Labhardt ND, Balo J-R, Ndam M, et al. Task shifting to non-physician clinicians for integrated management of hypertension and diabetes in rural Cameroon: a programme assessment at two years. *BMC Health Serv Res* 2010; 10: 339.
- [40] Ogola EN, Okello FO, Herr JL, et al. Healthy Heart Africa-Kenya: A 12-Month Prospective Evaluation of Program Impact on Health Care Providers' Knowledge and Treatment of Hypertension. *Glob Heart* 2019; 14: 61–70.
- [41] Zou G, Witter S, Caperon L, et al. Adapting and implementing training, guidelines and treatment cards to improve primary care-based hypertension and diabetes management in a fragile context: results of a feasibility study in Sierra Leone. *BMC Public Health* 2020; 20: 1185.
- [42] Berhe DF, Taxis K, Haaijer-Ruskamp FM, et al. Hypertension treatment practices and its determinants among ambulatory patients: retrospective cohort study in Ethiopia. *BMJ Open* 2017; 7: e015743–e015743.
- [43] Birungi J, Kivuyo S, Garrib A, et al. Integrating health services for HIV infection, diabetes and hypertension in sub-Saharan Africa: a cohort study. *BMJ Open* 2021; 11: e053412-.
- [44] Miselli MA, Cavallin F, Marwa S, et al. An integrated management system for noncommunicable diseases program implementation in a sub-saharan setting. *Int J Environ Res Public Health* 2021; 18.
- [45] Gausi B, Berkowitz N, Jacob N, et al. Treatment outcomes among adults with HIV/non-communicable disease multimorbidity attending integrated care clubs in Cape Town, South Africa. *AIDS Res Ther* 2021; 18: 72.
- [46] Kachimanga C, Dibba Y, Patiño M, et al. Implementation of a non-communicable disease clinic in rural Sierra Leone: early experiences and lessons learned. *J Public Health Policy* 2021; 42: 422–438.
- [47] Otieno HA, Miezah C, Yonga G, et al. Improved blood pressure control via a novel chronic disease management model of care in sub-Saharan Africa: Real-world program implementation results. *J Clin Hypertens* 2021; 23: 785–792.



- [48] Vedanthan R, Kumar A, Kamano JH, et al. Effect of nurse-based management of hypertension in Rural Western Kenya. *Glob Heart* 2020; 15.
- [49] Ratnayake R, Wittcoff A, Majaribu J, et al. Early experiences in the integration of non-communicable diseases into emergency primary health care, beni region, democratic republic of the Congo. *Ann Glob Health* 2021; 87.
- [50] Asgedom SW, Atey TM, Desse TA. Antihypertensive medication adherence and associated factors among adult hypertensive patients at Jimma University Specialized Hospital, southwest Ethiopia. *BMC Res Notes* 2018; 11: 27.
- [51] Ambaw AD, Alemie GA, W/Yohannes SM, et al. Adherence to antihypertensive treatment and associated factors among patients on follow up at University of Gondar Hospital, Northwest Ethiopia. *BMC Public Health* 2012; 12: 282.
- [52] Mekonnen HS, Gebrie MH, Eyasu KH, et al. Drug adherence for antihypertensive medications and its determinants among adult hypertensive patients attending in chronic clinics of referral hospitals in Northwest Ethiopia. *BMC Pharmacol Toxicol* 2017; 18: 27.
- [53] Akunne OO, Adedapo ADA. Antihypertensive prescription among black patients without compelling indications: prescription, effectiveness, quality and cost of medication. *BMC Health Serv Res* 2019; 19: 373.
- [54] Adedapo ADA, Sikuade O, Adeleke S, et al. Drug utilization and blood pressure control in a population where antihypertensives are given free: effect of policy change. *Afr J Med Med Sci* 2012; 41: 349–356.
- [55] Gala P, Moshokgo V, Seth B, et al. Medication Errors and Blood Pressure Control Among Patients Managed for Hypertension in Public Ambulatory Care Clinics in Botswana. *J Am Heart Assoc* 2020; 9: 1–10.
- [56] Lulebo AM, Kaba DK, Atake SE-H, et al. Task shifting in the management of hypertension in Kinshasa, Democratic Republic of Congo: a cross-sectional study. *BMC Health Serv Res* 2017; 17: 698.
- [57] Mlawanda G, Pather M, Govender S. An analysis of blood pressure measurement in a primary care hospital in Swaziland. *Afr J Prim Health Care Fam Med* 2014; 6: E1–E9.
- [58] Sharp A, Riches N, Mims A, et al. Decentralising NCD management in rural southern Africa: evaluation of a pilot implementation study. *BMC Public Health* 2020; 20: 44.
- [59] Mashozhera S, Bamitale SK, Godman B, et al. Compliance to hypertensive prescribing guidelines and blood pressure control in elderly patients in Namibia: Findings and implications. *Journal of Pharmaceutical Health Services Research* 2021; 12: 53–60.
- [60] Ameh S. Evaluation of an integrated HIV and hypertension management model in rural south africa: a mixed methods approach. *Glob Health Action* 2020; 13: 1750216.
- [61] Pfister C-L, Govender S, Dyer RA, et al. A multicenter, cross-sectional quality improvement project: The perioperative implementation of a hypertension protocol by anesthesiologists. *Anesth Analg* 2020; 1401–1408.
- [62] Pillay S, Pillay D, Pillay RS. The burden of hypertension in KwaZulu-Natal Province, South Africa: A 6-year perspective. *South African Medical Journal* 2021; 111: 159–165.
- [63] Harrison MA, Marfo AFA, Opere-Addo MNA, et al. Anti-hypertensive medication access and affordability and their association with blood pressure control at a teaching hospital in ghana. *Pan African Medical Journal* 2021; 39.
- [64] Menyanu EK, Corso B, Minicuci N, et al. Determinants of change in blood pressure in Ghana: Longitudinal data from WHO-SAGE Waves 1-3. *PLoS One* 2021; 16.

- [65] Sarfo FS, Ovbiagele B. Apparent Treatment Resistant Hypertension Among Stroke Survivors in Ghana. *Journal of Stroke and Cerebrovascular Diseases* 2020; 29.
- [66] Adomako NO, Marfo AFA, Opare-Addo MNA, et al. Blood Pressure Control, Accessibility, and Adherence to Antihypertensive Medications: Patients Seeking Care in Two Hospitals in the Ashanti Region of Ghana. *Int J Hypertens* 2021; 2021.
- [67] Kuria N, Reid A, Owiti P, et al. Compliance with follow-up and adherence to medication in hypertensive patients in an urban informal settlement in Kenya: comparison of three models of care. *Trop Med Int Health* 2018; 23: 785–794.
- [68] Mbau L, Harrison R, Kizito W, et al. Case identification, retention and blood pressure control in Kenya. *Public Health Action* 2022; 12: 58–63.
- [69] Kande C, Mash R. Improving the quality of care for patients with hypertension in Moshupa District, Botswana: quality improvement cycle. *Afr J Prim Health Care Fam Med* 2014; 6: E1–E4.
- [70] Mbui JM, Oluoka MN, Guantai EM, et al. Prescription patterns and adequacy of blood pressure control among adult hypertensive patients in Kenya; findings and implications. *Expert Rev Clin Pharmacol* 2017; 10: 1263–1271.
- [71] Folb N, Bachmann MO, Bateman ED, et al. Socioeconomic and modifiable predictors of blood pressure control for hypertension in primary care attenders in the Western Cape, South Africa. *S Afr Med J* 2016; 106: 1241–1246.
- [72] Iwelunmor J, Plange-Rhule J, Airhihenbuwa CO, et al. A Narrative Synthesis of the Health Systems Factors Influencing Optimal Hypertension Control in Sub-Saharan Africa. *PLoS One* 2015; 10: e0130193–e0130193.
- [73] Brunström M, Ng N, Dahlström J, et al. Association of Physician Education and Feedback on Hypertension Management With Patient Blood Pressure and Hypertension Control. *JAMA Netw Open* 2020; 3: e1918625–e1918625.
- [74] Abegaz TM, Tefera YG, Befekadu Abebe T. Target Organ Damage and the Long Term Effect of Nonadherence to Clinical Practice Guidelines in Patients with Hypertension: A Retrospective Cohort Study. *Int J Hypertens* 2017; 1–8.
- [75] Di Palo KE, Kish T. The role of the pharmacist in hypertension management. *Curr Opin Cardiol* 2018; 33: 382–387.
- [76] Gyamfi J, Plange-Rhule J, Iwelunmor J, et al. Training nurses in task-shifting strategies for the management and control of hypertension in Ghana: a mixed-methods study. *BMC Health Serv Res* 2017; 17: 1–9.
- [77] Himmelfarb CRD, Commodore-Mensah Y, Hill MN. Expanding the Role of Nurses to Improve Hypertension Care and Control Globally. *Ann Glob Health* 2016; 82: 243–253.
- [78] Odonkor ST, Frimpong K. Burnout among Healthcare Professionals in Ghana: A Critical Assessment. *Biomed Res Int* 2020; 2020: 1614968.
- [79] Neupane D, Gao Y, Feng Y, et al. Estimation of the Global Gap in Clinic Visits for Hypertension Care between Patient Need and Physician Capacity. *Hypertension* 2021; 779–786.
- [80] Peresu E, Heunis JC, Kigozi NG, et al. Task-shifting directly observed treatment and multidrug-resistant tuberculosis injection administration to lay health workers: stakeholder perceptions in rural Eswatini. *Hum Resour Health*; 18. Epub ahead of print 1 December 2020. DOI: 10.1186/S12960-020-00541-4.
- [81] Thornton J. Botswana’s HIV/AIDS success. *The Lancet* 2022; 400: 480–481.



- [82] Fraser HSFF, Allen C, Bailey C, et al. Information systems for patient follow-up and chronic management of HIV and tuberculosis: a life-saving technology in resource-poor areas. *J Med Internet Res* 2007; 9: e29–e29.
- [83] Suzan-Monti M, Blanche J, Boyer S, et al. Benefits of task-shifting HIV care to nurses in terms of health-related quality of life in patients initiating antiretroviral therapy in rural district hospitals in Cameroon [Stratall Agence Nationale de Recherche sur le SIDA (ANRS) 12110/Ensemble pour une Solidarité Thérapeutique Hospitalière en Réseau (ESTHER) substudy]. *HIV Med* 2015; 16: 307–318.
- [84] Busza J, Dauya E, Bandason T, et al. The role of community health workers in improving HIV treatment outcomes in children: lessons learned from the ZENITH trial in Zimbabwe. *Health Policy Plan* 2018; 33: 328–334.
- [85] Loubiere S, Boyer S, Protopopescu C, et al. Decentralization of HIV care in Cameroon: Increased access to antiretroviral treatment and associated persistent barriers. *Health Policy (New York)* 2009; 92: 165–173.
- [86] Lancet T. National disease registries for advancing health care. *The Lancet* 2011; 378: 2050.
- [87] O'Brien E. How Registries Can Guide Our Future? *Hypertension* 2017; 69: 198–199.
- [88] Myanganbayar M, Baatarsuren U, Chen G, et al. Hypertension knowledge, attitudes, and practices of nurses and physicians in primary care in Ulaanbaatar Mongolia. *J Clin Hypertens* 2019; 21: 1202–1209.
- [89] Chan BTB, Rauscher C, Issina AM, et al. A programme to improve quality of care for patients with chronic diseases, Kazakhstan. *Bull World Health Organ* 2020; 98: 161–169.
- [90] Gnugesser E, Chwila C, Brenner S, et al. The economic burden of treating uncomplicated hypertension in Sub-Saharan Africa: a systematic literature review. *BMC Public Health* 2022; 22: 1507.
- [91] Wagenaar BH, Gimbel S, Hoek R, et al. Wait and consult times for primary healthcare services in central Mozambique: a time-motion study. *Glob Health Action*; 9. Epub ahead of print 1 December 2016. DOI: 10.3402/GHA.V9.31980.
- [92] Son YJ, Lee EK, Ko Y. Association of Working Hours and Patient Safety Competencies with Adverse Nurse Outcomes: A Cross-Sectional Study. *Int J Environ Res Public Health*; 16. Epub ahead of print 1 November 2019. DOI: 10.3390/IJERPH16214083.
- [93] de Maeseneer J, Li D, Palsdottir B, et al. Universal health coverage and primary health care: the 30 by 2030 campaign. *Bull World Health Organ* 2020; 98: 812.
- [94] Greer SL, Méndez CA. Universal Health Coverage: A Political Struggle and Governance Challenge. *Am J Public Health* 2015; 105: S637.
- [95] American Public Health Association. The Importance of Universal Health Care in Improving Our Nation's Response to Pandemics and Health Disparities, <https://www.apha.org/Policies-and-Advocacy/Public-Health-Policy-Statements/Policy-Database/2021/01/14/The-Importance-of-Universal-Health-Care-in-Improving-Response-to-Pandemics-and-Health-Disparities> (accessed 18 August 2022).
- [96] Johnson O, Begg K, Kelly AH, et al. Interventions to strengthen the leadership capabilities of health professionals in Sub-Saharan Africa: a scoping review. *Health Policy Plan* 2021; 36: 117–133.
- [97] Lustig A, Ogden M, Brenner RW, et al. The Central Role of Physician Leadership for Driving Change in Value-Based Care Environments. *J Manag Care Spec Pharm* 2016; 22: 1116–1122.

- [98] Johnson O, Begg K, Kelly AH, et al. Interventions to strengthen the leadership capabilities of health professionals in Sub-Saharan Africa: a scoping review. *Health Policy Plan* 2021; 36: 117–133.
- [99] Liang X, Shi L, Wang Y, et al. The association of hypertension with the severity and mortality of COVID-19 patients: Evidence based on adjusted effect estimates. *J Infect* 2020; 81: e44–e47.
- [100] de Almeida-Pititto B, Dualib PM, Zajdenverg L, et al. Severity and mortality of COVID 19 in patients with diabetes, hypertension and cardiovascular disease: a meta-analysis. *Diabetol Metab Syndr* 2020; 12: 75.
- [101] Fernández-de-las-Peñas C, Torres-Macho J, Velasco-Arribas M, et al. Preexisting hypertension is associated with a greater number of long-term post-COVID symptoms and poor sleep quality: a case–control study. *Journal of Human Hypertension* 2022 36:6 2022; 36: 582–584.
- [102] United Nations. Department of Economic and Social Affairs | Sustainable Development Goals, <https://sdgs.un.org/goals/goal3> (2020, accessed 4 November 2020).

# Identification and screening of studies for inclusion

Identification

Records identified from databases  
(n=7494 )

Duplicates (n= 3121)

Screening

Records screened by title or title  
and abstract  
(n=4373)

Irrelevant (n=4168)

Records screened by full-text  
review  
(n=205)

**Excluded after full-text review  
(n=166)**

- Descriptive studies (n=70)
- Lack of eligible hypertension outcome (n=27)
- Ineligible intervention/ factor (n=4)
- Full text unavailable (n=16)
- Ineligible study design (n=30)
- Not in clinical setting (n=11)
- Conducted outside SSA (n=2)
- Conference report (n=1)
- Systematic review (n=4)
- Critical risk of bias (n=1)

Included

Studies included in the review  
(n=39)

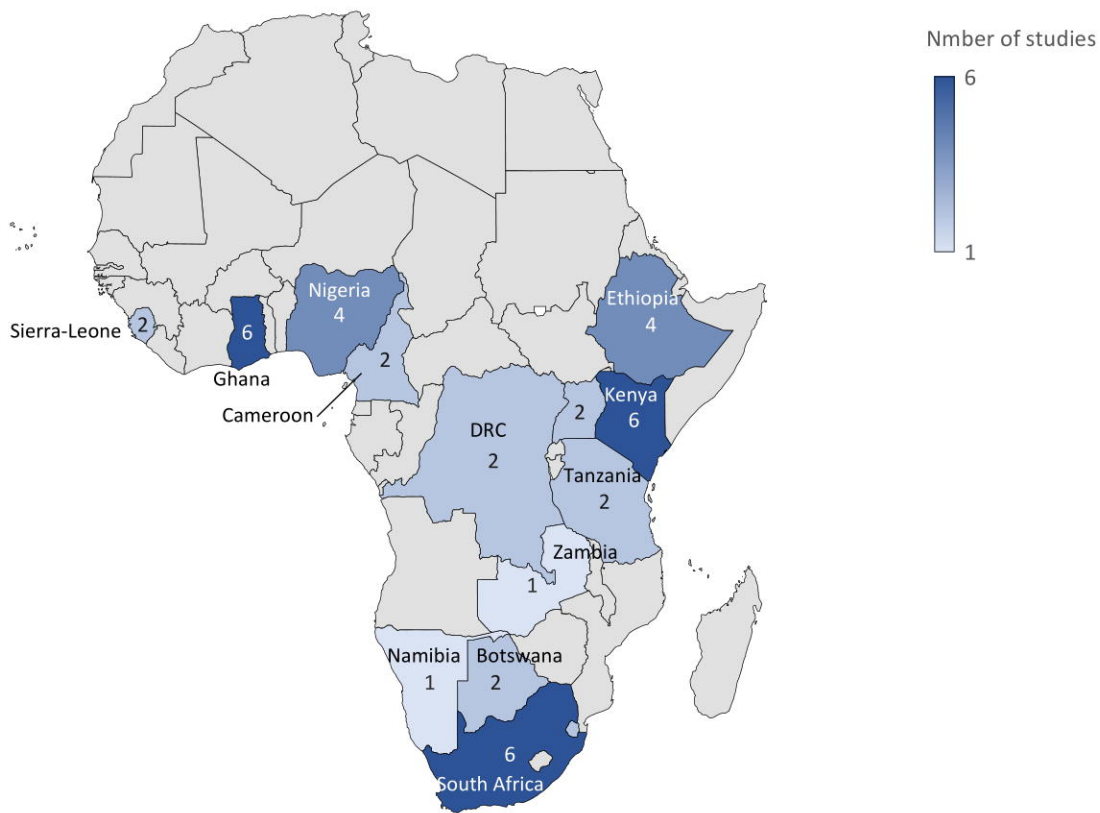

Source: https://medrxiv.org/content/10.1101/2022.10.19.22280830v1.full.pdf
