# Supplementary material for: Health System Determinants of Hypertension Care and Outcomes in Sub-Saharan Africa: A Systematic Review
Source: medRxiv preprint, doi:10.1101/2022.10.19.22280830, version 1 (2022-10-21)

**Supplementary File 2. JBI Quality Assessment Tools**

Risk of bias for randomized controlled trials


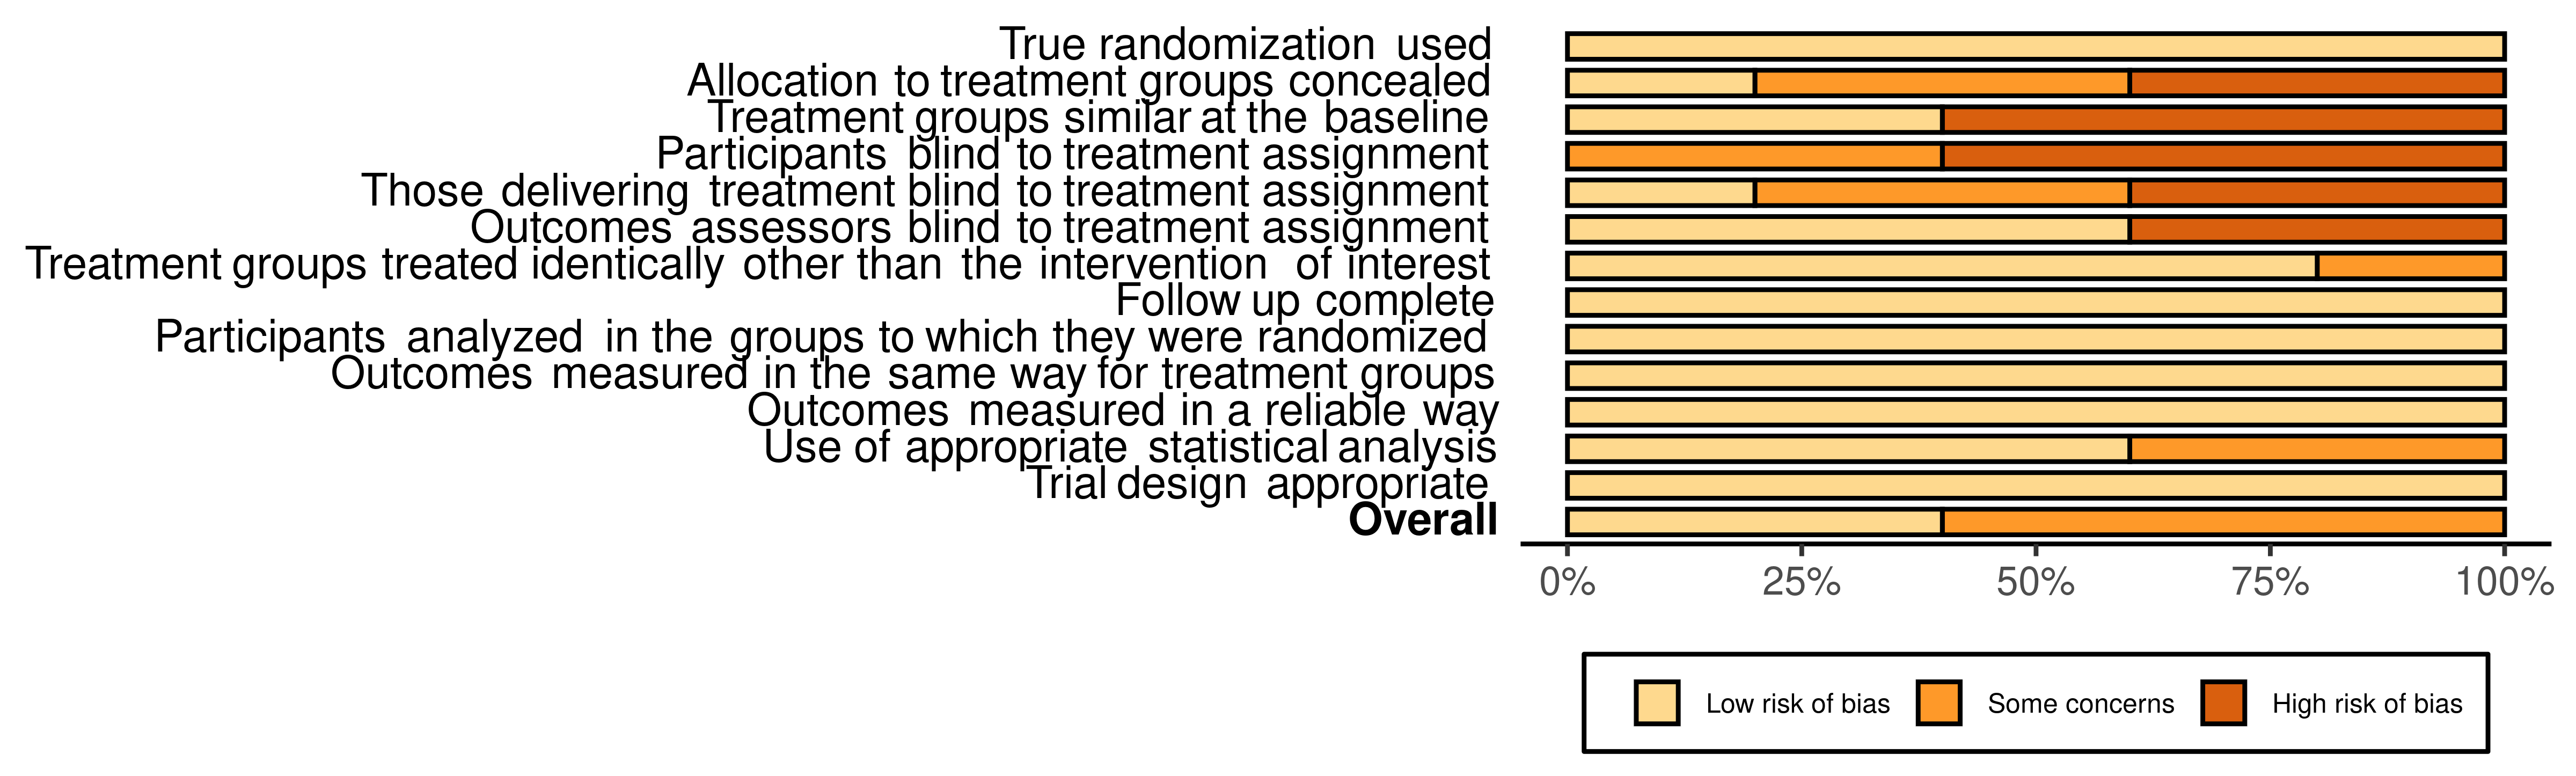


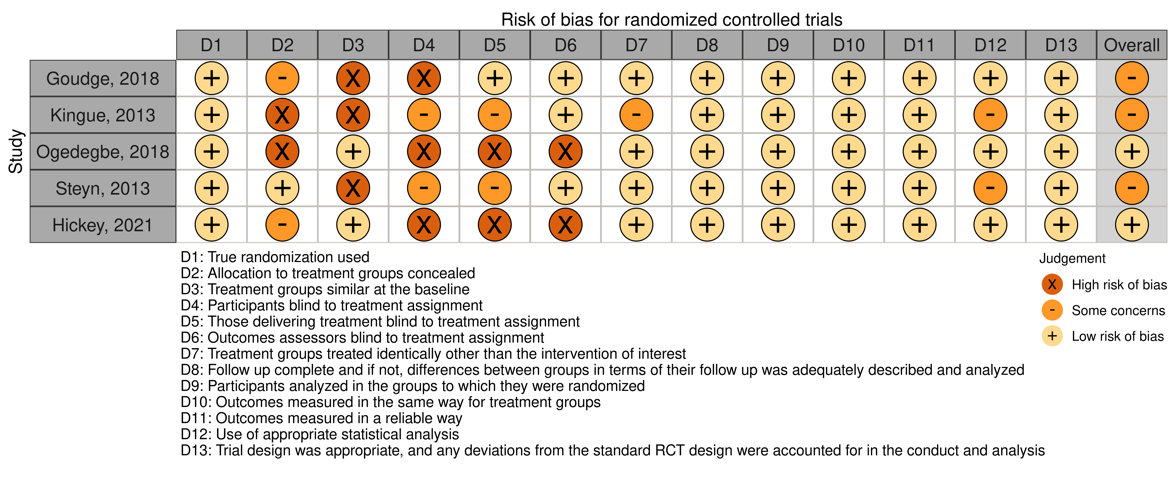


Risk of bias for quasi-experimental studies
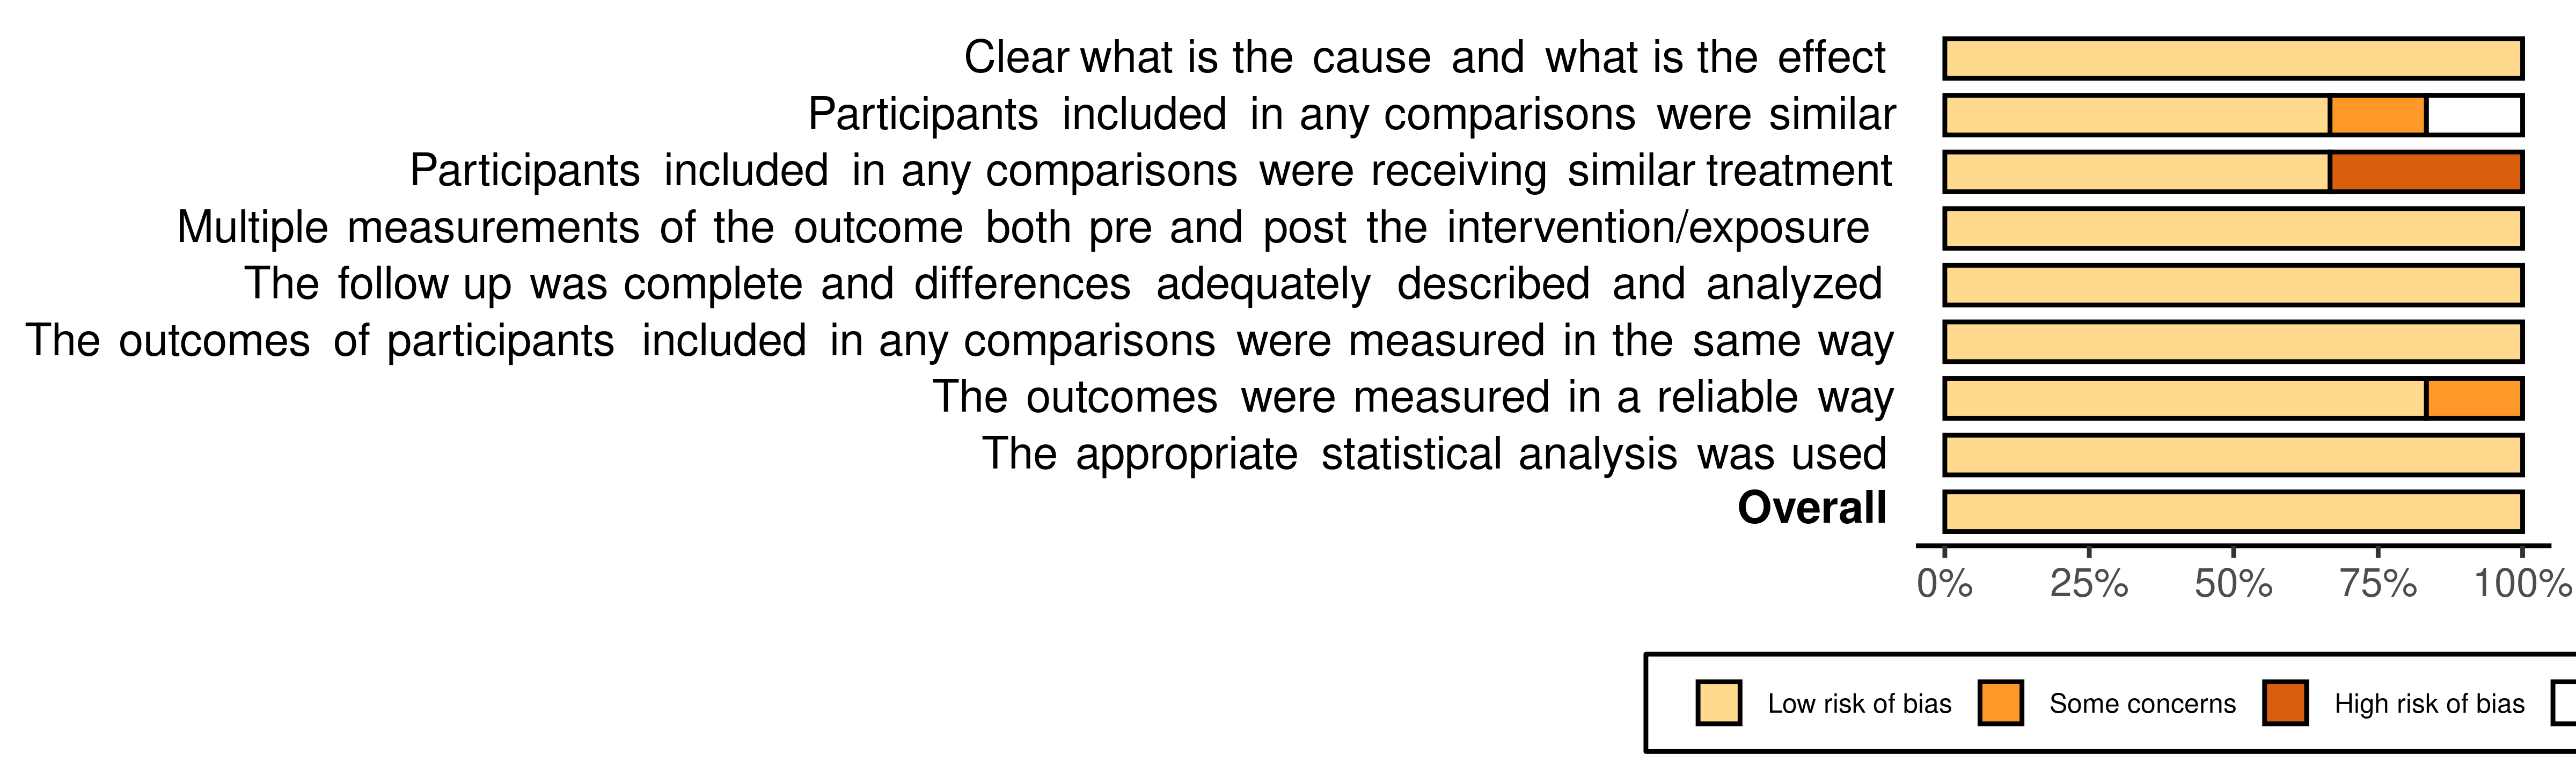


**
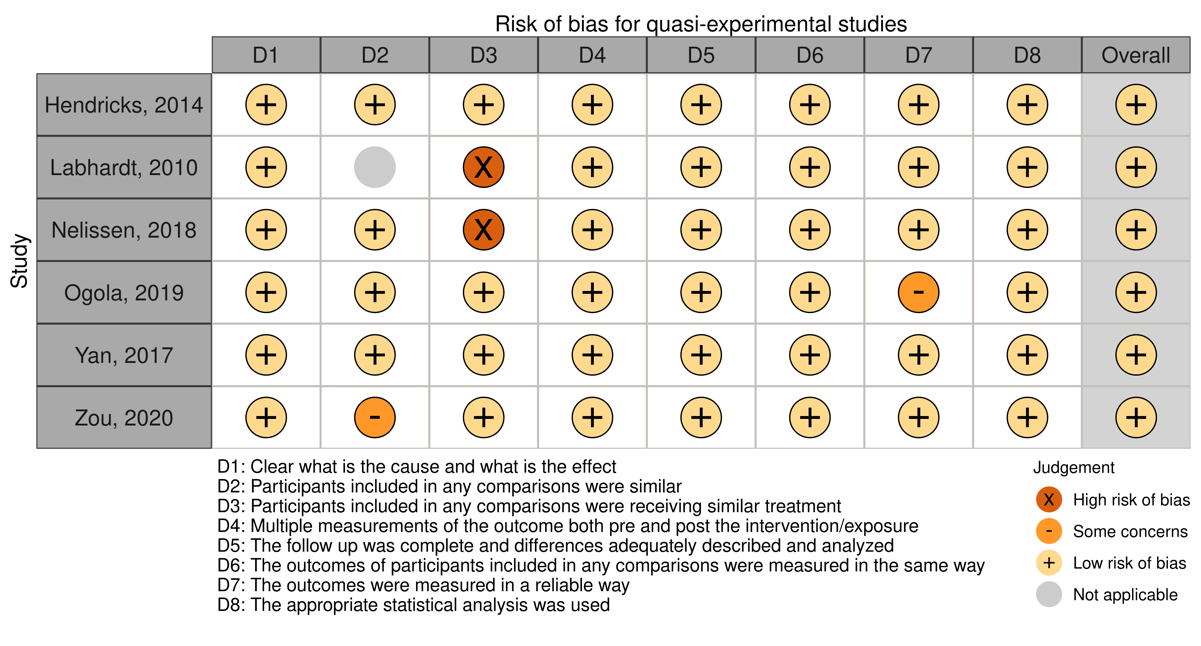
**

Risk of bias assessment for cohort studies

**
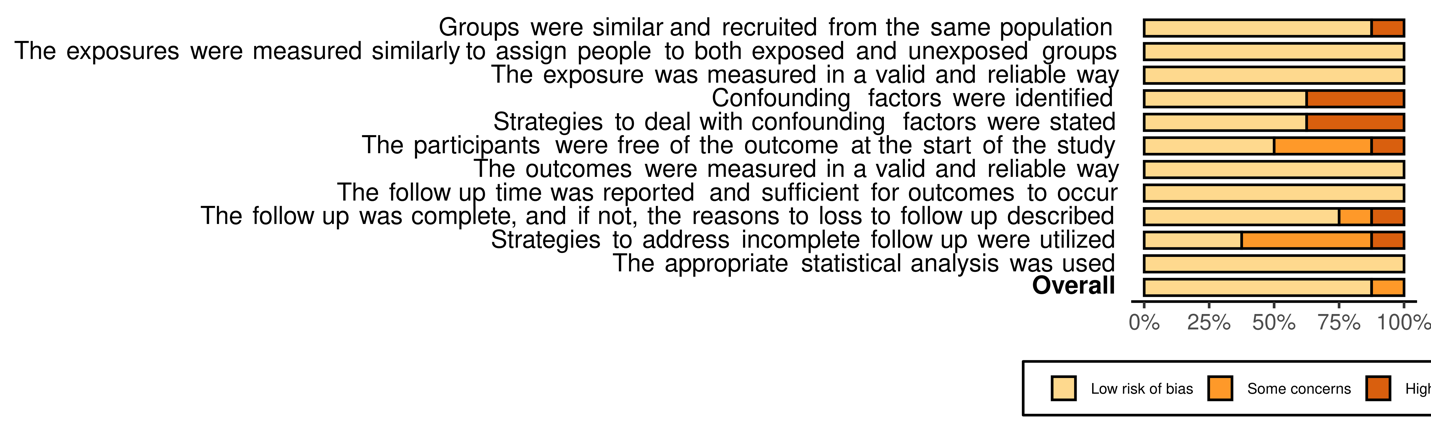
**

**
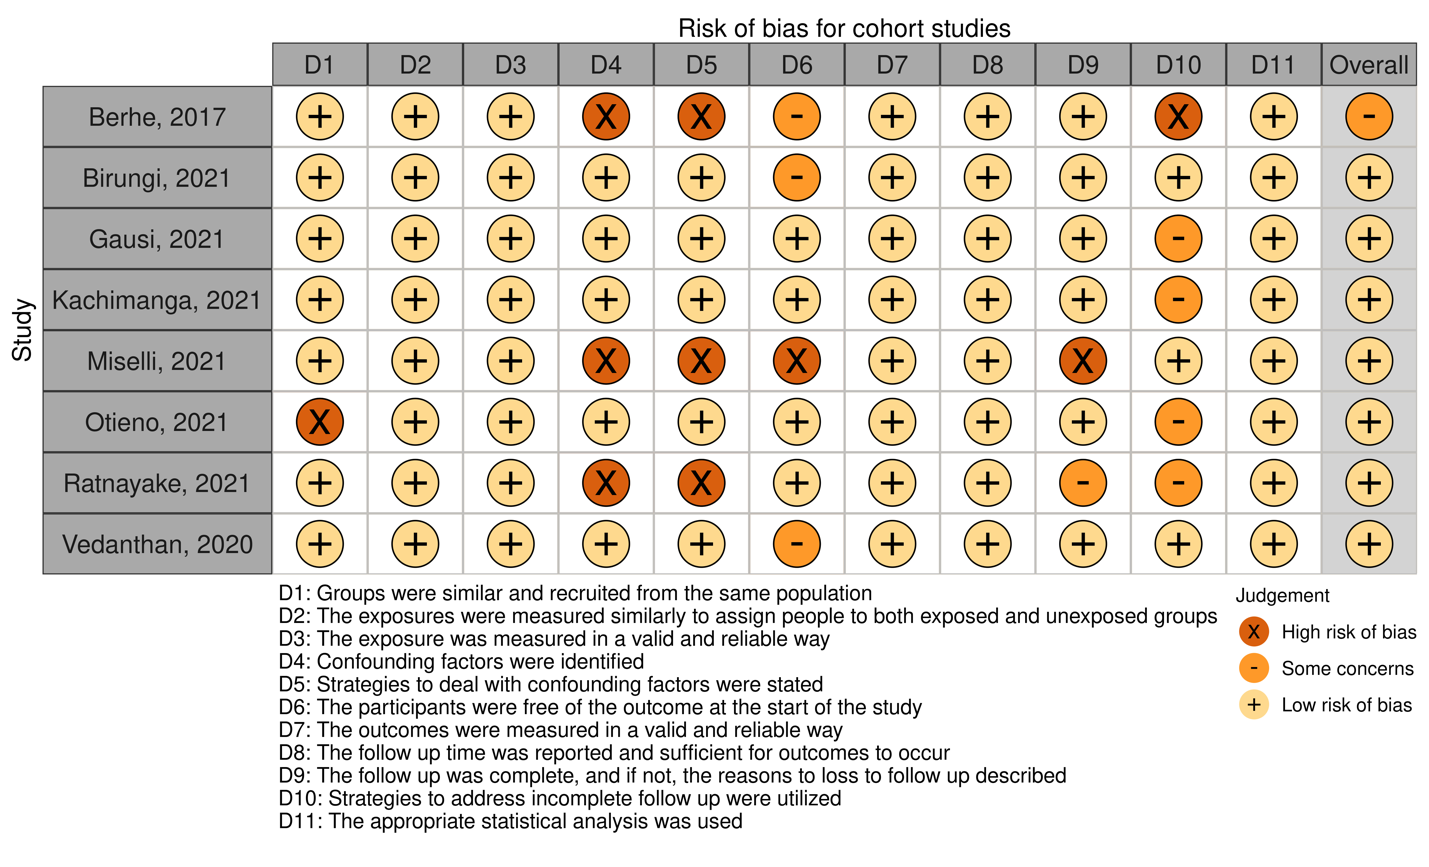
**

Risk of bias for cross-sectional studies

**
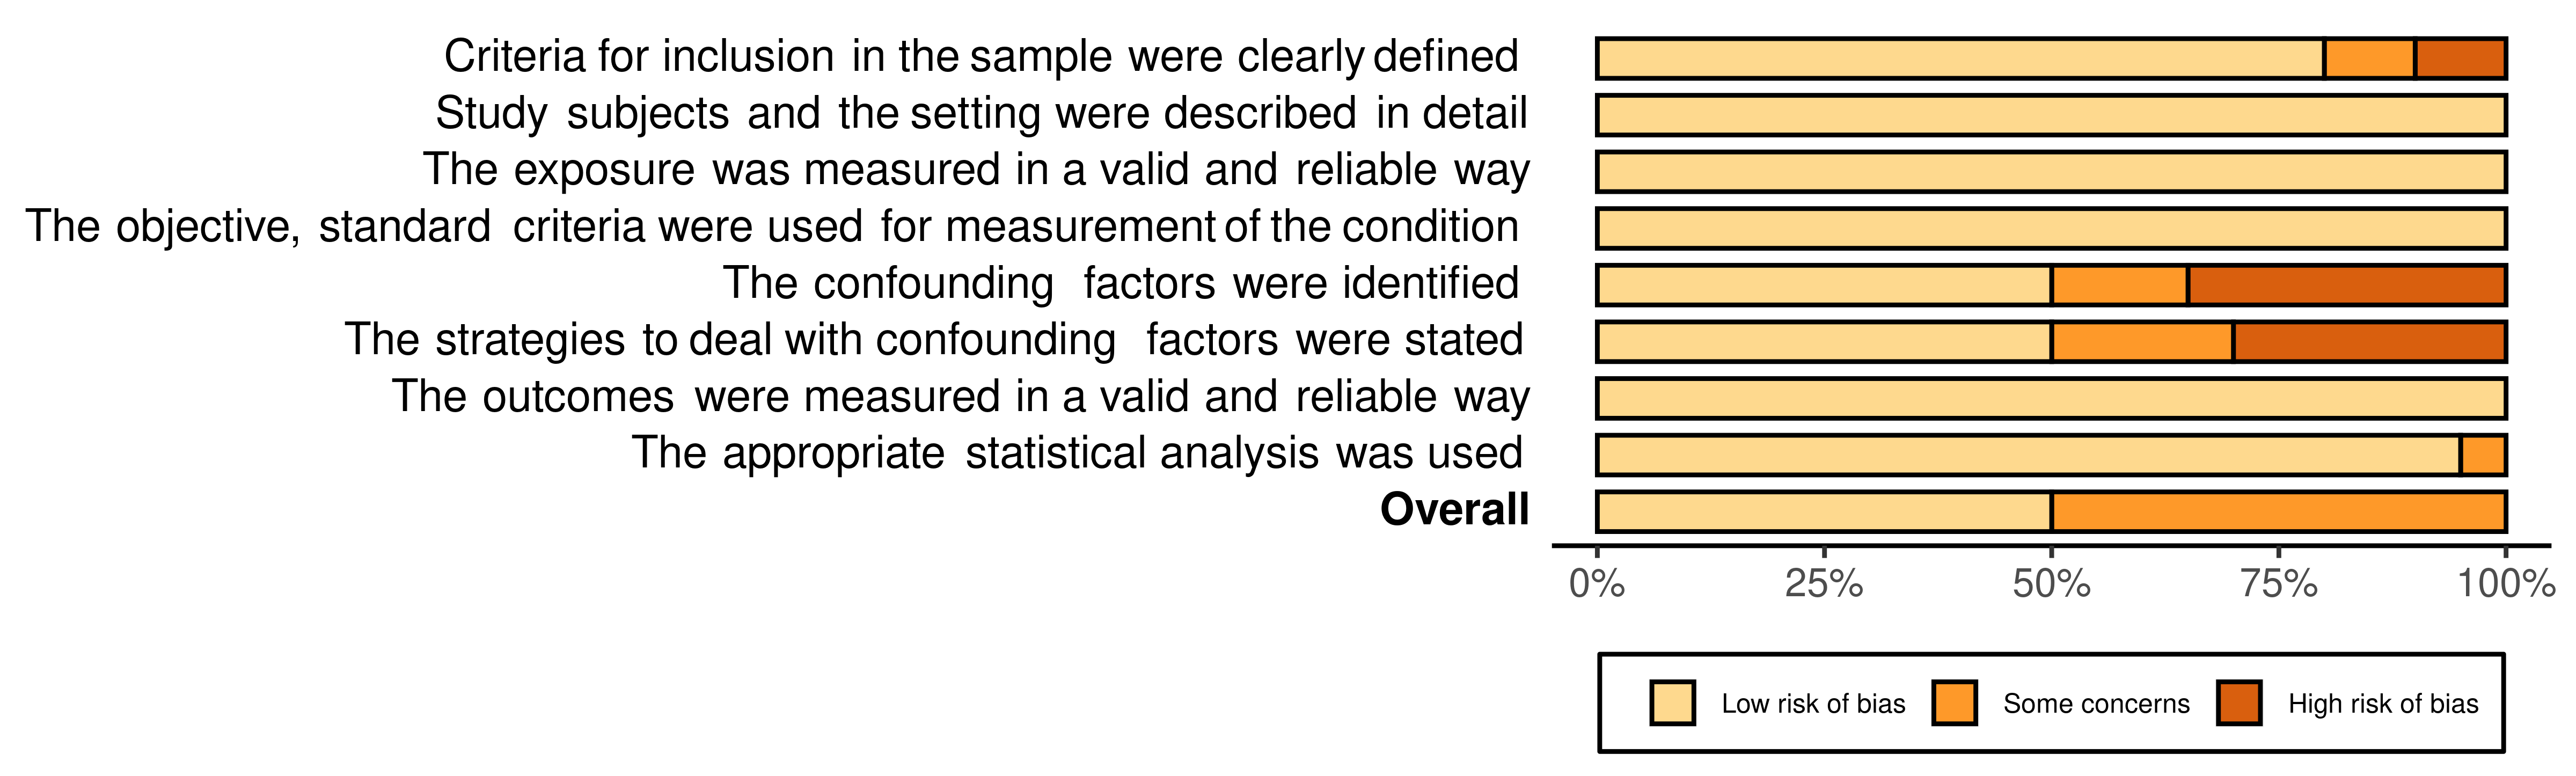
**


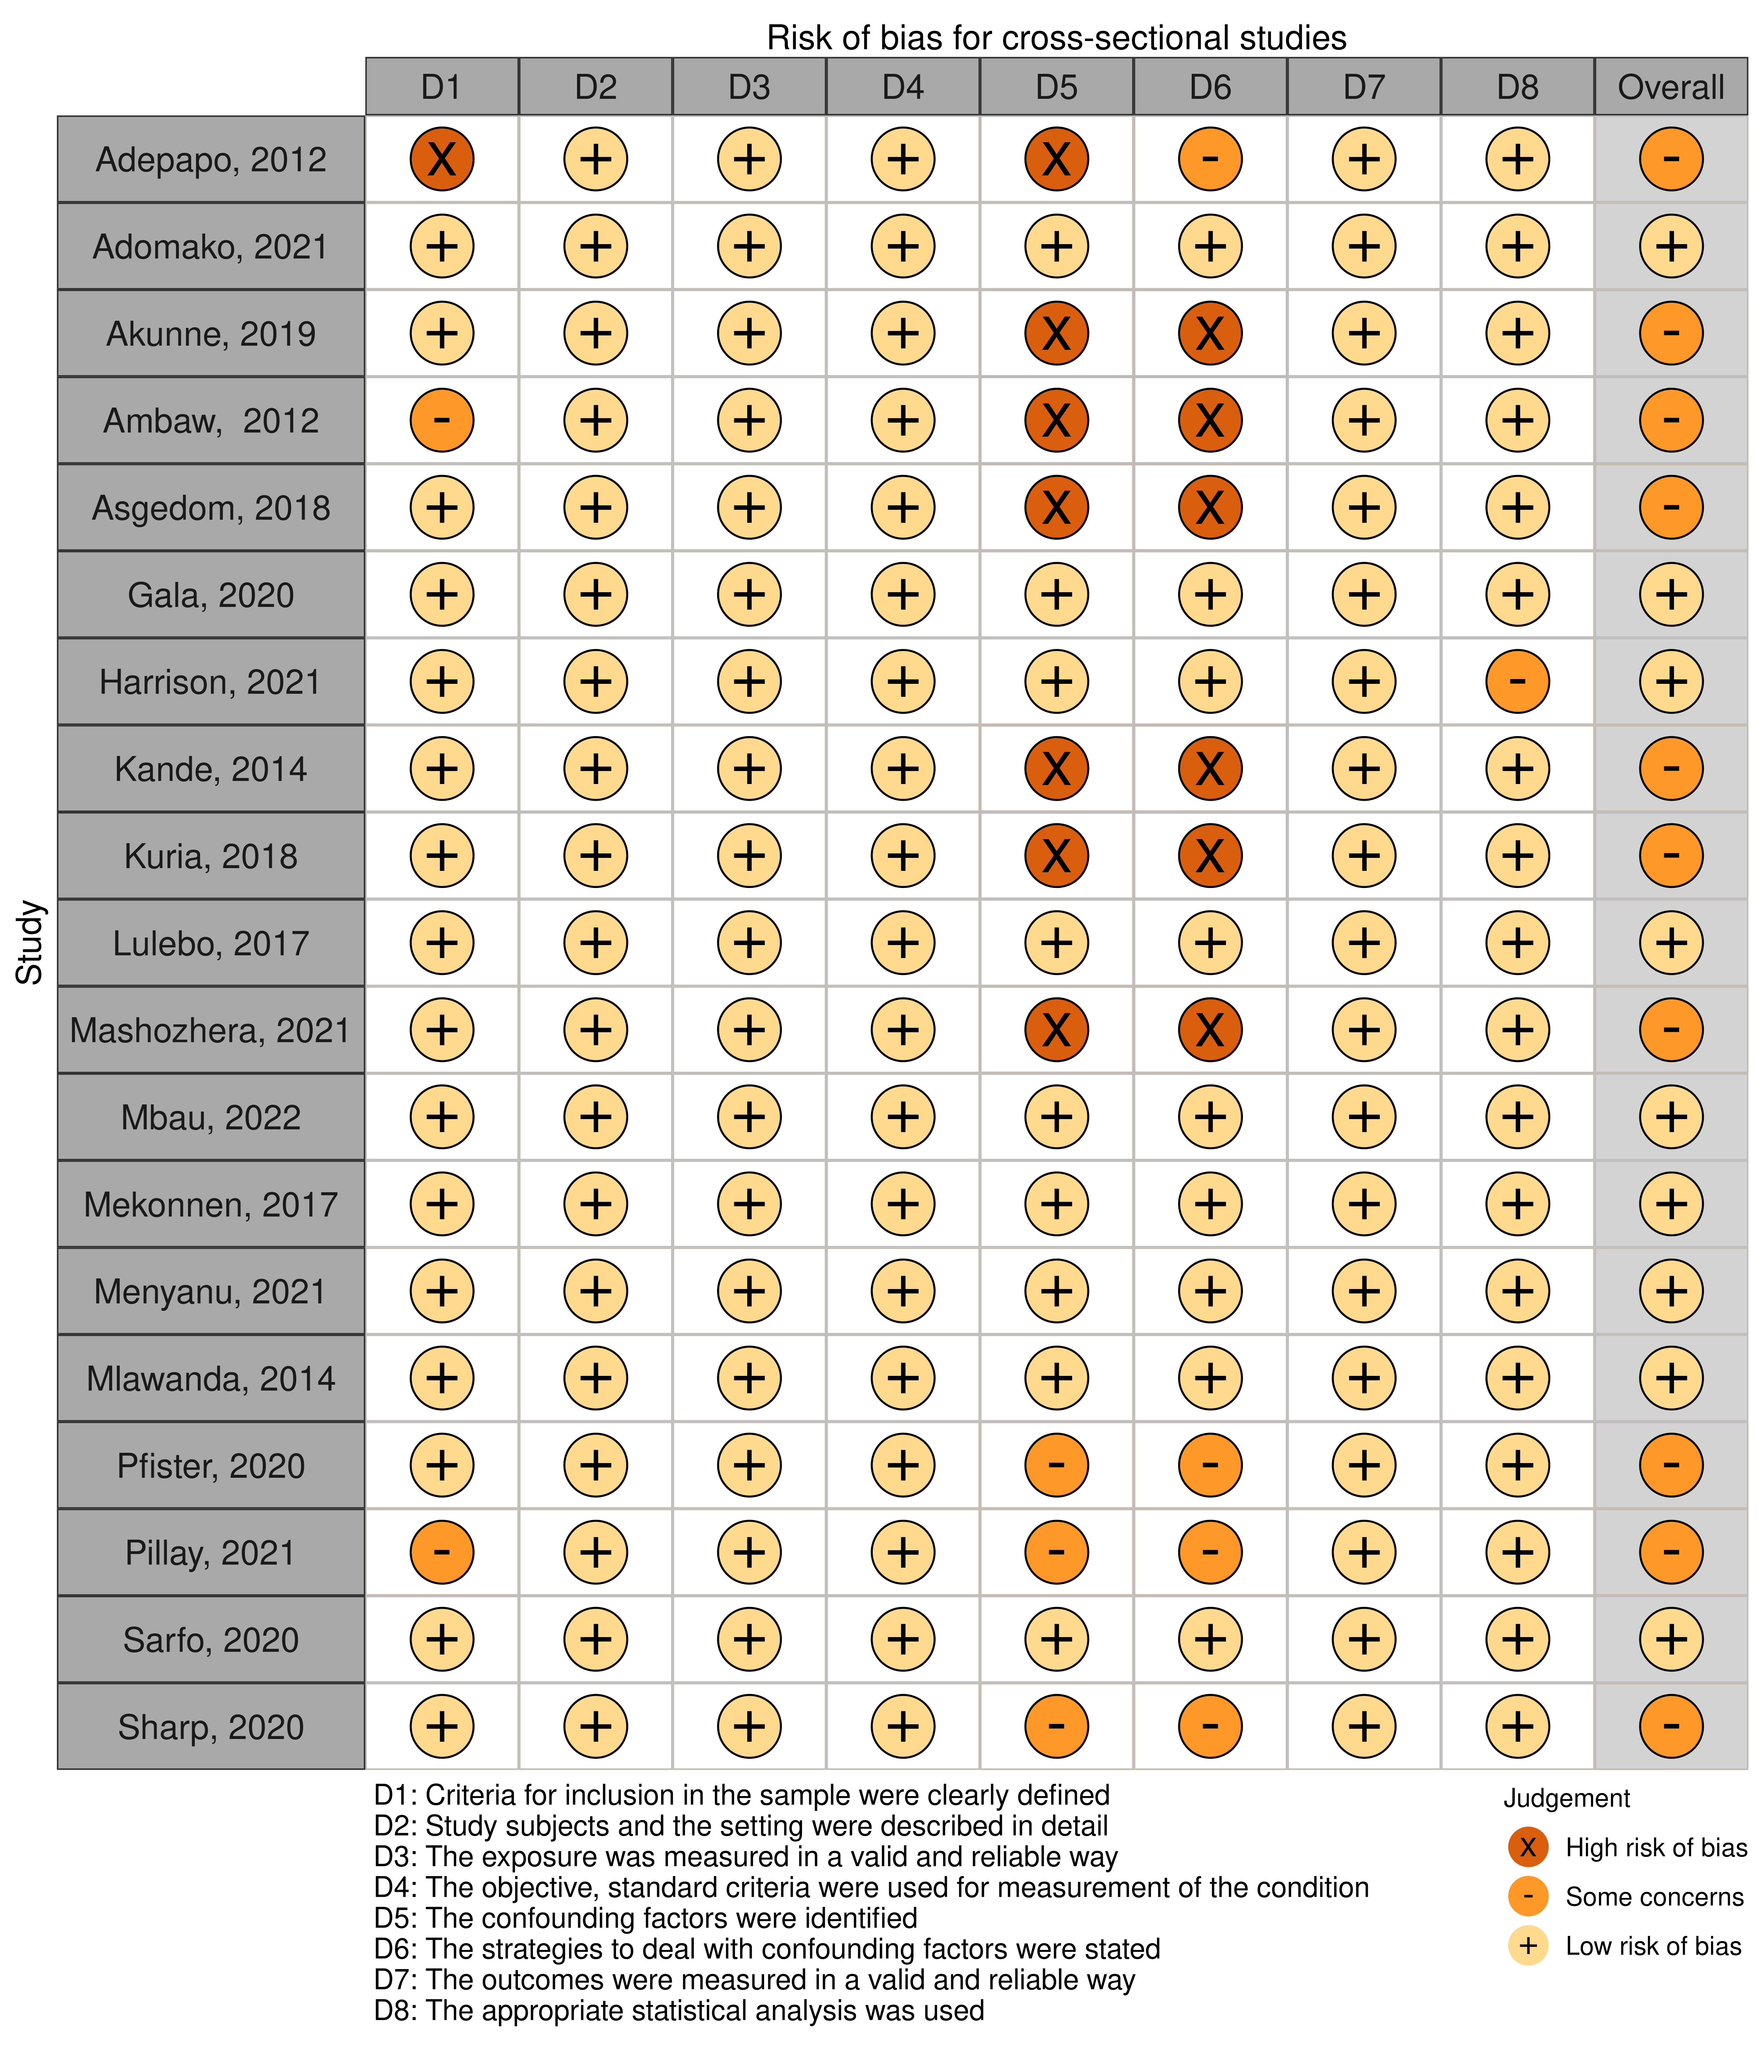

Supplement: S-File 3. JBI Quality Assessment Results [file 280830_file07.docx]
